# Supplementary material for: Genetic Variability in VEGFA Gene Influences the Effectiveness of Tennis Elbow Therapy with PRP: A Two-Year Prospective Cohort Study
Source: MDPI journal article supplement (doi:10.3390/ijms242417292), 2023-12-09
Supplement: s1 [file s1]

**Table S1.** PROMs values in individuals with particular genotypes of the *VEGFA* gene polymorphisms in additive model.

| PROM                  | week  | Genotypes of rs699947 |       |        |       |        |       | P value             |          |          |          |
|-----------------------|-------|-----------------------|-------|--------|-------|--------|-------|---------------------|----------|----------|----------|
|                       |       | AA                    |       | AC     |       | CC     |       | Kruskal-Wallis test | AA vs AC | AA vs CC | AC vs CC |
|                       |       | Median                | ±QD   | Median | ±QD   | Median | ±QD   |                     |          |          |          |
| VAS                   | 0     | 6.00                  | 2.00  | 6.00   | 1.50  | 5.00   | 1.50  | 0.559               |          |          |          |
|                       | 2     | 4.00                  | 1.00  | 3.00   | 1.50  | 4.00   | 1.00  | 0.293               |          |          |          |
|                       | 4     | 3.00                  | 1.00  | 3.00   | 1.50  | 4.00   | 1.50  | 0.710               |          |          |          |
|                       | 8     | 3.00                  | 1.50  | 3.00   | 2.00  | 3.50   | 1.50  | 0.620               |          |          |          |
|                       | 12    | 3.00                  | 1.50  | 2.00   | 1.50  | 2.50   | 2.00  | 0.728               |          |          |          |
|                       | 24    | 2.00                  | 2.50  | 2.00   | 2.00  | 3.00   | 2.50  | 0.891               |          |          |          |
|                       | 52    | 2.00                  | 2.00  | 1.00   | 2.00  | 2.00   | 2.50  | 0.645               |          |          |          |
|                       | 104   | 1.00                  | 1.50  | 1.00   | 1.50  | 1.00   | 2.00  | 0.808               |          |          |          |
| ΔVAS<br>(vs week 0)   | 2     | 1.00                  | 1.50  | 2.00   | 1.50  | 1.00   | 1.50  | 0.595               |          |          |          |
|                       | 4     | 3.00                  | 1.25  | 2.00   | 1.75  | 1.50   | 2.00  | 0.095               |          |          |          |
|                       | 8     | 3.00                  | 2.00  | 2.00   | 2.00  | 2.00   | 2.00  | 0.249               |          |          |          |
|                       | 12    | 3.00                  | 1.75  | 2.00   | 2.00  | 2.50   | 2.50  | 0.334               |          |          |          |
|                       | 24    | 3.00                  | 1.50  | 2.00   | 2.00  | 2.50   | 2.50  | 0.513               |          |          |          |
|                       | 52    | 4.00                  | 2.50  | 4.00   | 2.00  | 2.00   | 2.50  | 0.686               |          |          |          |
|                       | 104   | 4.50                  | 2.25  | 4.00   | 2.00  | 4.00   | 2.50  | 0.908               |          |          |          |
|                       | QDASH | 0                     | 56.81 | 12.37  | 50.00 | 15.91  | 52.27 | 12.50               | 0.336    |          |          |
| 2                     |       | 36.36                 | 14.77 | 39.77  | 16.48 | 39.77  | 11.36 | 0.612               |          |          |          |
| 4                     |       | 36.36                 | 11.36 | 31.82  | 16.48 | 38.64  | 12.50 | 0.293               |          |          |          |
| 8                     |       | 31.82                 | 19.32 | 29.55  | 17.05 | 40.91  | 18.18 | 0.109               |          |          |          |
| 12                    |       | 27.27                 | 21.59 | 25.00  | 14.77 | 34.09  | 15.91 | 0.316               |          |          |          |
| 24                    |       | 14.77                 | 22.16 | 23.86  | 20.45 | 34.09  | 23.86 | 0.307               |          |          |          |
| 52                    |       | 22.73                 | 21.59 | 13.64  | 19.89 | 31.82  | 26.14 | 0.272               |          |          |          |
| 104                   |       | 6.82                  | 21.59 | 11.36  | 13.64 | 20.91  | 28.41 | 0.633               |          |          |          |
| ΔQDASH<br>(vs week 0) | 2     | 6.81                  | 13.07 | 5.69   | 13.64 | 6.81   | 16.57 | 0.828               |          |          |          |
|                       | 4     | 19.31                 | 12.50 | 11.36  | 15.91 | 11.36  | 15.91 | 0.646               |          |          |          |
|                       | 8     | 19.32                 | 21.02 | 15.91  | 18.19 | 11.36  | 14.41 | 0.680               |          |          |          |
|                       | 12    | 19.32                 | 22.09 | 18.18  | 18.18 | 18.18  | 10.23 | 0.661               |          |          |          |
|                       | 24    | 20.45                 | 18.18 | 21.59  | 20.46 | 17.04  | 20.46 | 0.521               |          |          |          |
|                       | 52    | 18.17                 | 18.19 | 30.68  | 19.31 | 15.91  | 21.59 | 0.588               |          |          |          |
|                       | 104   | 32.95                 | 18.75 | 29.55  | 22.73 | 28.41  | 21.14 | 0.832               |          |          |          |
|                       | PRTEE | 0                     | 55.50 | 12.75  | 49.50 | 13.25  | 52.25 | 14.75               | 0.544    |          |          |
| 2                     |       | 30.00                 | 13.75 | 26.50  | 18.13 | 31.50  | 16.50 | 0.417               |          |          |          |
| 4                     |       | 24.50                 | 7.75  | 24.00  | 14.63 | 27.50  | 13.75 | 0.568               |          |          |          |
| 8                     |       | 27.00                 | 15.50 | 21.00  | 13.00 | 28.25  | 14.00 | 0.201               |          |          |          |
| 12                    |       | 22.00                 | 18.25 | 16.50  | 15.25 | 21.50  | 11.25 | 0.621               |          |          |          |
| 24                    |       | 9.75                  | 17.25 | 15.25  | 15.75 | 19.25  | 17.25 | 0.557               |          |          |          |
| 52                    |       | 16.25                 | 15.13 | 7.50   | 12.63 | 16.00  | 21.50 | 0.364               |          |          |          |
| 104                   |       | 5.00                  | 16.25 | 7.00   | 9.75  | 14.75  | 16.50 | 0.683               |          |          |          |
| ΔPRTEE<br>(vs week 0) | 2     | 17.50                 | 10.75 | 16.00  | 11.88 | 12.50  | 13.75 | 0.619               |          |          |          |
|                       | 4     | 29.00                 | 13.88 | 21.25  | 11.13 | 19.75  | 14.75 | 0.332               |          |          |          |
|                       | 8     | 31.25                 | 16.63 | 28.00  | 15.25 | 17.75  | 15.50 | 0.203               |          |          |          |
|                       | 12    | 32.75                 | 20.63 | 29.50  | 17.00 | 25.25  | 12.00 | 0.565               |          |          |          |

|     |       |       |       |       |       |       |       |
|-----|-------|-------|-------|-------|-------|-------|-------|
| 24  | 32.50 | 17.50 | 28.50 | 19.50 | 26.50 | 15.50 | 0.295 |
| 52  | 32.00 | 17.00 | 38.50 | 18.75 | 25.50 | 15.50 | 0.407 |
| 104 | 37.25 | 18.38 | 38.50 | 16.25 | 37.75 | 18.50 | 0.707 |

| PROM                  | week | Genotypes of rs2010963 |       |        |       |        |       | P value             |          |          |          |
|-----------------------|------|------------------------|-------|--------|-------|--------|-------|---------------------|----------|----------|----------|
|                       |      | CC                     |       | CG     |       | GG     |       | Kruskal-Wallis test | CC vs CG | CC vs GG | CG vs GG |
|                       |      | Median                 | ±QD   | Median | ±QD   | Median | ±QD   |                     |          |          |          |
| VAS                   | 0    | 5.00                   | 0.50  | 6.00   | 2.00  | 6.00   | 1.75  | 0.435               |          |          |          |
|                       | 2    | 4.50                   | 1.00  | 4.00   | 1.50  | 4.00   | 1.50  | 0.687               |          |          |          |
|                       | 4    | 3.50                   | 1.50  | 3.00   | 1.50  | 3.00   | 1.50  | 0.893               |          |          |          |
|                       | 8    | 4.50                   | 2.00  | 3.00   | 1.00  | 3.00   | 2.00  | 0.701               |          |          |          |
|                       | 12   | 4.00                   | 2.00  | 3.00   | 2.00  | 2.00   | 1.50  | 0.248               |          |          |          |
|                       | 24   | 3.50                   | 2.50  | 3.00   | 2.00  | 2.00   | 2.00  | 0.174               |          |          |          |
|                       | 52   | 4.00                   | 2.50  | 2.00   | 2.00  | 1.00   | 1.50  | 0.066               |          |          |          |
|                       | 104  | 0.50                   | 2.75  | 2.00   | 1.50  | 0.50   | 1.00  | 0.102               |          |          |          |
| ΔVAS<br>(vs week 0)   | 2    | 0.00                   | 1.50  | 1.00   | 2.00  | 1.00   | 1.50  | 0.165               | 0.577    | 0.064    | 0.208    |
|                       | 4    | 0.50                   | 1.50  | 2.00   | 2.00  | 2.75   | 1.50  | 0.424               |          |          |          |
|                       | 8    | 0.50                   | 1.50  | 2.00   | 2.50  | 3.00   | 1.50  | 0.304               |          |          |          |
|                       | 12   | 2.50                   | 1.50  | 2.00   | 2.50  | 3.00   | 1.50  | 0.216               |          |          |          |
|                       | 24   | 1.50                   | 2.00  | 2.00   | 2.00  | 3.00   | 1.50  | 0.092               |          |          |          |
|                       | 52   | 1.00                   | 2.00  | 2.00   | 3.50  | 4.00   | 2.00  | 0.030               |          |          |          |
|                       | 104  | 2.50                   | 2.50  | 3.00   | 2.00  | 4.00   | 2.50  | 0.193               |          |          |          |
| QDASH                 | 0    | 47.50                  | 15.91 | 47.50  | 14.20 | 52.27  | 10.09 | 0.677               | 1.000    | 1.000    | 0.024    |
|                       | 2    | 37.50                  | 6.82  | 43.18  | 16.48 | 36.36  | 18.18 | 0.465               |          |          |          |
|                       | 4    | 37.50                  | 12.50 | 37.50  | 12.50 | 34.09  | 17.05 | 0.413               |          |          |          |
|                       | 8    | 38.64                  | 14.77 | 35.23  | 14.77 | 29.55  | 20.45 | 0.299               |          |          |          |
|                       | 12   | 36.36                  | 18.18 | 30.68  | 16.48 | 20.45  | 20.45 | 0.029               |          |          |          |
|                       | 24   | 39.77                  | 26.14 | 31.82  | 15.91 | 15.91  | 22.73 | 0.084               |          |          |          |
|                       | 52   | 39.77                  | 26.14 | 20.45  | 21.59 | 13.64  | 22.73 | 0.432               |          |          |          |
|                       | 104  | 1.14                   | 25.00 | 22.73  | 15.91 | 4.55   | 12.50 | 0.017               | 0.477    | 1.000    | 0.018    |
| ΔQDASH<br>(vs week 0) | 2    | 1.02                   | 9.09  | 3.18   | 13.64 | 11.36  | 13.64 | 0.136               | 1.000    | 1.000    | 0.024    |
|                       | 4    | 3.29                   | 12.61 | 9.09   | 10.80 | 20.45  | 14.13 | 0.107               |          |          |          |
|                       | 8    | 5.57                   | 18.18 | 11.36  | 16.48 | 20.45  | 18.18 | 0.142               |          |          |          |
|                       | 12   | 15.91                  | 9.20  | 14.77  | 15.34 | 27.27  | 19.32 | 0.030               |          |          |          |
|                       | 24   | 12.50                  | 16.02 | 13.64  | 20.45 | 28.36  | 18.75 | 0.041               |          |          |          |
|                       | 52   | 6.81                   | 16.02 | 20.45  | 22.73 | 29.54  | 18.75 | 0.151               |          |          |          |
|                       | 104  | 27.27                  | 29.09 | 22.72  | 16.92 | 40.90  | 18.19 | 0.023               |          |          |          |
| PRTEE                 | 0    | 44.00                  | 10.75 | 53.75  | 15.38 | 52.00  | 12.25 | 0.134               | 0.510    | 1.000    | 0.025    |
|                       | 2    | 36.00                  | 17.50 | 28.50  | 16.50 | 30.00  | 16.00 | 0.819               |          |          |          |
|                       | 4    | 26.25                  | 16.50 | 25.25  | 11.13 | 23.50  | 15.00 | 0.640               |          |          |          |
|                       | 8    | 25.75                  | 17.25 | 24.25  | 13.13 | 20.50  | 16.00 | 0.402               |          |          |          |
|                       | 12   | 22.00                  | 12.50 | 21.50  | 15.00 | 15.25  | 16.50 | 0.078               |          |          |          |
|                       | 24   | 24.25                  | 20.50 | 20.50  | 17.25 | 10.00  | 17.00 | 0.060               |          |          |          |
|                       | 52   | 23.75                  | 22.50 | 13.00  | 14.75 | 6.00   | 13.00 | 0.264               |          |          |          |
|                       | 104  | 0.00                   | 21.75 | 14.75  | 12.50 | 2.50   | 8.25  | 0.022               |          |          |          |
| ΔPRTEE                | 2    | 10.25                  | 10.75 | 14.50  | 13.88 | 17.50  | 10.38 | 0.117               |          |          |          |
|                       | 4    | 5.75                   | 12.50 | 20.50  | 13.13 | 26.45  | 12.88 | 0.150               |          |          |          |

|             |     |       |       |       |       |       |       |       |
|-------------|-----|-------|-------|-------|-------|-------|-------|-------|
| (vs week 0) | 8   | 9.00  | 10.25 | 26.75 | 16.75 | 29.00 | 14.45 | 0.111 |
|             | 12  | 22.75 | 8.25  | 26.75 | 16.63 | 31.00 | 18.00 | 0.325 |
|             | 24  | 18.75 | 11.25 | 27.00 | 19.75 | 33.50 | 17.75 | 0.116 |
|             | 52  | 16.50 | 9.75  | 38.00 | 19.50 | 33.25 | 16.63 | 0.062 |
|             | 104 | 26.75 | 16.75 | 37.50 | 16.25 | 39.00 | 15.75 | 0.204 |

| PROM                  | week | Genotypes of rs1413711 |       |        |       |        |       | P value             |          |          |          |
|-----------------------|------|------------------------|-------|--------|-------|--------|-------|---------------------|----------|----------|----------|
|                       |      | CC                     |       | CT     |       | TT     |       | Kruskal-Wallis test | CC vs CT | CC vs TT | CT vs TT |
|                       |      | Median                 | ±QD   | Median | ±QD   | Median | ±QD   |                     |          |          |          |
| VAS                   | 0    | 5.00                   | 1.50  | 6.00   | 1.63  | 6.00   | 2.00  | 0.833               |          |          |          |
|                       | 2    | 4.00                   | 1.00  | 3.00   | 1.50  | 4.50   | 1.00  | 0.157               |          |          |          |
|                       | 4    | 4.00                   | 1.50  | 3.00   | 1.50  | 3.00   | 1.00  | 0.727               |          |          |          |
|                       | 8    | 3.50                   | 1.50  | 3.00   | 2.00  | 2.50   | 1.50  | 0.558               |          |          |          |
|                       | 12   | 2.50                   | 2.00  | 3.00   | 2.00  | 2.00   | 2.00  | 0.339               |          |          |          |
|                       | 24   | 3.00                   | 2.50  | 2.00   | 2.00  | 2.00   | 2.00  | 0.568               |          |          |          |
|                       | 52   | 2.00                   | 2.50  | 1.00   | 2.00  | 2.00   | 2.00  | 0.970               |          |          |          |
|                       | 104  | 1.00                   | 2.00  | 1.00   | 1.50  | 1.00   | 1.50  | 0.855               |          |          |          |
| ΔVAS<br>(vs week 0)   | 2    | 1.00                   | 1.50  | 2.00   | 1.50  | 1.00   | 1.50  | 0.506               |          |          |          |
|                       | 4    | 1.50                   | 2.00  | 2.00   | 1.50  | 3.00   | 1.50  | 0.290               |          |          |          |
|                       | 8    | 2.00                   | 2.00  | 2.50   | 2.00  | 3.00   | 2.00  | 0.358               |          |          |          |
|                       | 12   | 2.50                   | 2.50  | 2.00   | 2.00  | 3.00   | 1.50  | 0.330               |          |          |          |
|                       | 24   | 2.50                   | 2.50  | 2.00   | 2.00  | 3.00   | 1.50  | 0.469               |          |          |          |
|                       | 52   | 2.00                   | 2.50  | 4.00   | 2.00  | 4.00   | 2.25  | 0.659               |          |          |          |
|                       | 104  | 4.00                   | 2.50  | 4.00   | 2.00  | 5.00   | 2.00  | 0.975               |          |          |          |
| QDASH                 | 0    | 52.27                  | 12.50 | 52.27  | 16.48 | 52.27  | 11.37 | 0.469               |          |          |          |
|                       | 2    | 39.77                  | 11.36 | 38.64  | 15.91 | 44.32  | 15.91 | 0.335               |          |          |          |
|                       | 4    | 38.64                  | 12.50 | 29.55  | 15.91 | 36.36  | 9.09  | 0.207               |          |          |          |
|                       | 8    | 40.91                  | 18.18 | 29.55  | 17.61 | 29.55  | 19.32 | 0.121               |          |          |          |
|                       | 12   | 34.09                  | 15.91 | 27.27  | 17.61 | 21.59  | 20.45 | 0.179               |          |          |          |
|                       | 24   | 34.09                  | 23.86 | 25.00  | 20.45 | 13.64  | 20.45 | 0.194               |          |          |          |
|                       | 52   | 31.82                  | 26.14 | 13.64  | 21.59 | 20.45  | 18.18 | 0.349               |          |          |          |
|                       | 104  | 20.91                  | 28.41 | 14.77  | 14.78 | 6.82   | 21.59 | 0.606               |          |          |          |
| ΔQDASH<br>(vs week 0) | 2    | 6.81                   | 16.57 | 6.82   | 14.77 | 4.54   | 10.23 | 0.784               |          |          |          |
|                       | 4    | 11.36                  | 15.91 | 11.36  | 15.91 | 17.27  | 11.36 | 0.979               |          |          |          |
|                       | 8    | 11.36                  | 14.41 | 15.91  | 18.75 | 18.18  | 18.18 | 0.700               |          |          |          |
|                       | 12   | 18.18                  | 10.23 | 18.18  | 18.75 | 25.00  | 20.45 | 0.448               |          |          |          |
|                       | 24   | 17.04                  | 20.46 | 20.45  | 19.32 | 23.86  | 16.54 | 0.344               |          |          |          |
|                       | 52   | 15.91                  | 21.59 | 27.27  | 19.32 | 21.59  | 16.48 | 0.631               |          |          |          |
|                       | 104  | 28.41                  | 21.14 | 29.54  | 22.73 | 34.09  | 18.18 | 0.788               |          |          |          |
| PRTEE                 | 0    | 52.25                  | 14.75 | 49.75  | 13.88 | 54.50  | 11.30 | 0.779               |          |          |          |
|                       | 2    | 31.50                  | 16.50 | 25.00  | 17.25 | 35.00  | 14.50 | 0.223               |          |          |          |
|                       | 4    | 27.50                  | 13.75 | 24.00  | 14.25 | 26.25  | 12.25 | 0.528               |          |          |          |
|                       | 8    | 28.25                  | 14.00 | 21.25  | 14.00 | 26.75  | 16.00 | 0.222               |          |          |          |
|                       | 12   | 21.50                  | 11.25 | 18.50  | 17.50 | 15.50  | 16.50 | 0.434               |          |          |          |
|                       | 24   | 19.25                  | 17.25 | 16.00  | 16.50 | 9.50   | 16.25 | 0.278               |          |          |          |
|                       | 52   | 16.00                  | 21.50 | 9.50   | 13.25 | 12.50  | 10.25 | 0.497               |          |          |          |
|                       | 104  | 14.75                  | 16.50 | 7.25   | 11.00 | 4.50   | 14.00 | 0.668               |          |          |          |

|                               |     |       |       |       |       |       |       |       |
|-------------------------------|-----|-------|-------|-------|-------|-------|-------|-------|
| $\Delta$ PRTEE<br>(vs week 0) | 2   | 12.50 | 13.75 | 17.50 | 13.00 | 17.00 | 8.75  | 0.693 |
|                               | 4   | 19.75 | 14.75 | 21.50 | 12.25 | 27.00 | 10.50 | 0.527 |
|                               | 8   | 17.75 | 15.50 | 26.75 | 15.50 | 31.00 | 15.00 | 0.205 |
|                               | 12  | 25.25 | 12.00 | 28.00 | 17.13 | 36.50 | 15.75 | 0.234 |
|                               | 24  | 26.50 | 15.50 | 28.50 | 19.75 | 34.75 | 14.50 | 0.132 |
|                               | 52  | 25.50 | 15.50 | 36.00 | 19.00 | 32.75 | 17.13 | 0.332 |
|                               | 104 | 37.75 | 18.50 | 38.00 | 16.75 | 39.00 | 16.75 | 0.599 |

| PROM                          | week | Genotypes of rs3024998 |          |        |          |        |          | <i>P</i> value          |          |          |          |
|-------------------------------|------|------------------------|----------|--------|----------|--------|----------|-------------------------|----------|----------|----------|
|                               |      | CC                     |          | CT     |          | TT     |          | Kruskal-<br>Wallis test | CC vs CT | CC vs TT | CT vs TT |
|                               |      | Median                 | $\pm$ QD | Median | $\pm$ QD | Median | $\pm$ QD |                         |          |          |          |
| VAS                           | 0    | 6.00                   | 1.75     | 6.00   | 2.00     | 5.00   | 0.50     | 0.422                   |          |          |          |
|                               | 2    | 4.00                   | 1.50     | 4.00   | 1.50     | 4.50   | 1.00     | 0.611                   |          |          |          |
|                               | 4    | 3.00                   | 1.50     | 3.00   | 1.50     | 3.50   | 1.50     | 0.952                   |          |          |          |
|                               | 8    | 3.00                   | 2.00     | 3.00   | 1.00     | 4.50   | 2.00     | 0.727                   |          |          |          |
|                               | 12   | 2.00                   | 1.50     | 3.00   | 2.00     | 4.00   | 2.00     | 0.266                   |          |          |          |
|                               | 24   | 1.50                   | 2.00     | 2.50   | 2.00     | 3.50   | 2.50     | 0.138                   |          |          |          |
|                               | 52   | 1.00                   | 1.50     | 2.00   | 2.00     | 4.00   | 2.50     | 0.074                   |          |          |          |
|                               | 104  | 1.00                   | 1.50     | 2.00   | 1.50     | 0.50   | 2.75     | 0.253                   |          |          |          |
| $\Delta$ VAS<br>(vs week 0)   | 2    | 1.00                   | 1.50     | 1.00   | 2.00     | 0.00   | 1.50     | 0.178                   |          |          |          |
|                               | 4    | 3.00                   | 1.50     | 2.00   | 1.50     | 0.50   | 1.50     | 0.467                   |          |          |          |
|                               | 8    | 3.00                   | 1.63     | 2.00   | 2.50     | 0.50   | 1.50     | 0.323                   |          |          |          |
|                               | 12   | 3.25                   | 1.88     | 2.00   | 2.50     | 2.50   | 1.50     | 0.249                   |          |          |          |
|                               | 24   | 3.00                   | 1.50     | 2.00   | 2.00     | 1.50   | 2.00     | 0.095                   |          |          |          |
|                               | 52   | 4.00                   | 2.50     | 2.00   | 3.00     | 1.00   | 2.00     | 0.036                   | 0.261    | 0.068    | 0.537    |
|                               | 104  | 4.25                   | 2.50     | 3.00   | 2.00     | 2.50   | 2.50     | 0.243                   |          |          |          |
| QDASH                         | 0    | 52.27                  | 10.09    | 47.72  | 13.64    | 47.50  | 15.91    | 0.751                   |          |          |          |
|                               | 2    | 36.36                  | 17.78    | 43.18  | 15.91    | 37.50  | 6.82     | 0.849                   |          |          |          |
|                               | 4    | 36.36                  | 17.61    | 34.09  | 11.36    | 37.50  | 12.50    | 0.669                   |          |          |          |
|                               | 8    | 29.55                  | 20.45    | 34.09  | 15.91    | 38.64  | 14.77    | 0.403                   |          |          |          |
|                               | 12   | 22.73                  | 20.45    | 29.55  | 17.05    | 36.36  | 18.18    | 0.043                   | 0.037    | 1.000    | 1.000    |
|                               | 24   | 13.64                  | 23.86    | 31.82  | 15.91    | 39.77  | 26.14    | 0.058                   |          |          |          |
|                               | 52   | 14.77                  | 23.30    | 19.32  | 21.02    | 39.77  | 26.14    | 0.414                   |          |          |          |
|                               | 104  | 4.55                   | 12.50    | 22.73  | 19.32    | 1.14   | 25.00    | 0.040                   | 0.047    | 1.000    | 0.575    |
| $\Delta$ QDASH<br>(vs week 0) | 2    | 11.36                  | 12.50    | 4.54   | 12.59    | 1.02   | 9.09     | 0.442                   |          |          |          |
|                               | 4    | 18.18                  | 14.64    | 9.09   | 13.63    | 3.29   | 12.61    | 0.292                   |          |          |          |
|                               | 8    | 19.32                  | 18.75    | 11.36  | 18.18    | 5.57   | 18.18    | 0.233                   |          |          |          |
|                               | 12   | 26.13                  | 20.45    | 15.90  | 14.77    | 15.91  | 9.20     | 0.059                   |          |          |          |
|                               | 24   | 27.27                  | 19.31    | 14.77  | 20.43    | 12.50  | 16.02    | 0.043                   | 0.056    | 0.457    | 1.000    |
|                               | 52   | 29.54                  | 19.32    | 20.45  | 22.16    | 6.81   | 16.02    | 0.183                   |          |          |          |
|                               | 104  | 38.63                  | 18.75    | 22.72  | 18.05    | 27.27  | 29.09    | 0.053                   |          |          |          |
| PRTEE                         | 0    | 53.00                  | 12.25    | 53.50  | 15.50    | 44.00  | 10.75    | 0.160                   |          |          |          |
|                               | 2    | 33.25                  | 16.38    | 28.00  | 15.75    | 36.00  | 17.50    | 0.964                   |          |          |          |
|                               | 4    | 24.50                  | 17.13    | 24.50  | 11.00    | 26.25  | 16.50    | 0.868                   |          |          |          |
|                               | 8    | 21.00                  | 16.00    | 22.00  | 13.25    | 25.75  | 17.25    | 0.537                   |          |          |          |
|                               | 12   | 15.50                  | 16.50    | 21.50  | 14.75    | 22.00  | 12.50    | 0.106                   |          |          |          |
|                               | 24   | 10.00                  | 17.25    | 20.00  | 17.00    | 24.25  | 20.50    | 0.048                   | 0.043    | 1.000    | 1.000    |

|                               |     |       |       |       |       |       |       |       |       |       |       |
|-------------------------------|-----|-------|-------|-------|-------|-------|-------|-------|-------|-------|-------|
|                               | 52  | 8.25  | 14.25 | 12.25 | 13.50 | 23.75 | 22.50 | 0.226 |       |       |       |
|                               | 104 | 2.50  | 8.25  | 14.50 | 12.75 | 0.00  | 21.75 | 0.044 | 0.054 | 1.000 | 0.594 |
| $\Delta$ PRTEE<br>(vs week 0) | 2   | 17.50 | 11.00 | 15.50 | 13.75 | 10.25 | 10.75 | 0.128 |       |       |       |
|                               | 4   | 25.00 | 14.25 | 21.50 | 11.50 | 5.75  | 12.50 | 0.162 |       |       |       |
|                               | 8   | 28.75 | 14.98 | 25.50 | 15.75 | 9.00  | 10.25 | 0.112 |       |       |       |
|                               | 12  | 32.75 | 18.50 | 27.00 | 15.25 | 22.75 | 8.25  | 0.291 |       |       |       |
|                               | 24  | 34.50 | 19.00 | 27.25 | 17.25 | 18.75 | 11.25 | 0.090 |       |       |       |
|                               | 52  | 33.50 | 17.00 | 36.00 | 17.13 | 16.50 | 9.75  | 0.054 |       |       |       |
|                               | 104 | 39.00 | 16.75 | 37.00 | 16.25 | 26.75 | 16.75 | 0.191 |       |       |       |

| PROM                          | week | Genotypes of rs3025021 |       |        |       |        |       | <i>P</i> value      |          |          |          |
|-------------------------------|------|------------------------|-------|--------|-------|--------|-------|---------------------|----------|----------|----------|
|                               |      | CC                     |       | CT     |       | TT     |       | Kruskal-Wallis test | CC vs CT | CC vs TT | CT vs TT |
|                               |      | Median                 | ±QD   | Median | ±QD   | Median | ±QD   |                     |          |          |          |
| VAS                           | 0    | 5.00                   | 1.50  | 6.00   | 2.00  | 6.50   | 1.00  | 0.247               |          |          |          |
|                               | 2    | 3.00                   | 1.50  | 4.00   | 1.50  | 4.50   | 1.50  | 0.402               |          |          |          |
|                               | 4    | 3.00                   | 1.50  | 3.00   | 1.50  | 3.50   | 0.50  | 0.881               |          |          |          |
|                               | 8    | 3.00                   | 1.75  | 3.00   | 2.00  | 3.50   | 3.00  | 0.934               |          |          |          |
|                               | 12   | 2.50                   | 1.50  | 3.00   | 2.00  | 1.50   | 1.50  | 0.604               |          |          |          |
|                               | 24   | 2.00                   | 1.50  | 2.00   | 2.50  | 3.50   | 2.50  | 0.185               |          |          |          |
|                               | 52   | 2.00                   | 2.00  | 1.00   | 2.50  | 1.00   | 1.00  | 0.999               |          |          |          |
|                               | 104  | 1.00                   | 1.50  | 1.00   | 1.50  | 0.00   | 0.50  | 0.154               |          |          |          |
| $\Delta$ VAS<br>(vs week 0)   | 2    | 1.00                   | 1.50  | 1.00   | 2.00  | 1.50   | 2.50  | 0.946               |          |          |          |
|                               | 4    | 2.25                   | 1.50  | 2.00   | 2.00  | 3.00   | 2.50  | 0.686               |          |          |          |
|                               | 8    | 3.00                   | 2.00  | 2.00   | 2.50  | 4.00   | 3.00  | 0.698               |          |          |          |
|                               | 12   | 3.00                   | 1.50  | 2.00   | 2.00  | 4.50   | 3.50  | 0.714               |          |          |          |
|                               | 24   | 3.00                   | 1.50  | 2.00   | 2.00  | 2.50   | 3.00  | 0.839               |          |          |          |
|                               | 52   | 4.00                   | 2.00  | 3.00   | 2.50  | 5.00   | 2.50  | 0.790               |          |          |          |
|                               | 104  | 4.00                   | 1.50  | 4.00   | 2.50  | 6.00   | 1.00  | 0.157               |          |          |          |
| QDASH                         | 0    | 47.72                  | 12.51 | 52.27  | 12.50 | 52.27  | 15.91 | 0.586               |          |          |          |
|                               | 2    | 34.09                  | 14.77 | 43.18  | 17.05 | 47.73  | 17.05 | 0.402               |          |          |          |
|                               | 4    | 34.09                  | 14.77 | 37.50  | 14.77 | 32.95  | 11.36 | 0.899               |          |          |          |
|                               | 8    | 29.55                  | 18.75 | 34.09  | 17.05 | 29.55  | 19.32 | 0.694               |          |          |          |
|                               | 12   | 26.14                  | 16.48 | 30.68  | 20.45 | 25.00  | 14.77 | 0.512               |          |          |          |
|                               | 24   | 22.73                  | 21.59 | 31.82  | 21.59 | 25.00  | 15.91 | 0.724               |          |          |          |
|                               | 52   | 20.45                  | 21.59 | 20.45  | 25.00 | 11.36  | 9.09  | 0.813               |          |          |          |
|                               | 104  | 15.91                  | 17.05 | 13.64  | 22.73 | 5.68   | 6.82  | 0.546               |          |          |          |
| $\Delta$ QDASH<br>(vs week 0) | 2    | 5.68                   | 12.50 | 6.81   | 15.91 | 10.22  | 15.91 | 0.949               |          |          |          |
|                               | 4    | 11.36                  | 11.36 | 13.63  | 17.05 | 6.82   | 20.32 | 0.858               |          |          |          |
|                               | 8    | 13.63                  | 15.92 | 15.91  | 19.32 | 15.90  | 29.41 | 0.884               |          |          |          |
|                               | 12   | 20.45                  | 15.91 | 17.07  | 15.91 | 23.86  | 29.55 | 0.959               |          |          |          |
|                               | 24   | 18.18                  | 17.04 | 20.45  | 22.73 | 18.17  | 6.82  | 0.905               |          |          |          |
|                               | 52   | 28.36                  | 17.05 | 20.45  | 26.14 | 21.59  | 18.18 | 0.871               |          |          |          |
|                               | 104  | 29.54                  | 10.23 | 29.55  | 22.73 | 42.04  | 18.18 | 0.731               |          |          |          |
| PRTEE                         | 0    | 48.25                  | 10.25 | 53.75  | 14.75 | 57.75  | 16.50 | 0.228               |          |          |          |
|                               | 2    | 24.50                  | 13.00 | 31.00  | 16.75 | 34.00  | 6.00  | 0.494               |          |          |          |
|                               | 4    | 25.50                  | 13.75 | 24.25  | 14.50 | 24.00  | 12.25 | 0.908               |          |          |          |
|                               | 8    | 21.75                  | 16.50 | 24.25  | 15.75 | 20.50  | 17.75 | 0.873               |          |          |          |

|                               |     |       |       |       |       |       |       |       |
|-------------------------------|-----|-------|-------|-------|-------|-------|-------|-------|
|                               | 12  | 18.25 | 13.75 | 22.50 | 15.75 | 10.75 | 11.75 | 0.473 |
|                               | 24  | 13.50 | 16.75 | 15.00 | 18.50 | 14.25 | 15.75 | 0.789 |
|                               | 52  | 11.50 | 13.00 | 13.00 | 18.00 | 6.25  | 8.50  | 0.745 |
|                               | 104 | 7.50  | 11.75 | 9.00  | 14.00 | 1.50  | 3.50  | 0.559 |
| $\Delta$ PRTEE<br>(vs week 0) | 2   | 17.00 | 9.75  | 13.75 | 14.50 | 17.50 | 16.50 | 0.597 |
|                               | 4   | 22.00 | 12.25 | 20.50 | 13.25 | 28.25 | 23.00 | 0.565 |
|                               | 8   | 24.50 | 15.00 | 28.00 | 14.75 | 44.00 | 34.50 | 0.398 |
|                               | 12  | 30.50 | 14.25 | 24.00 | 15.00 | 43.00 | 28.00 | 0.411 |
|                               | 24  | 30.75 | 14.13 | 28.00 | 21.25 | 34.75 | 13.75 | 0.703 |
|                               | 52  | 33.00 | 12.75 | 32.00 | 20.00 | 37.25 | 17.50 | 0.553 |
|                               | 104 | 37.25 | 13.75 | 38.00 | 18.75 | 50.50 | 16.25 | 0.199 |

Legend: *VEGFA*, vascular endothelial growth factor A; QD, Quartile Deviation; PROMs, patient-reported outcome measures; VAS, Visual Analog Scale; QDASH, quick version of Disabilities of the Arm, Shoulder and Hand score; PRTEE, Patient-Rated Tennis Elbow Evaluation.

**Table S2.** PROMs values in carriers of different genotypes of the rs699947 polymorphism of the *VEGFA* gene.PROMs values in CC homozygotes and carriers of the A allele of the rs699947 *VEGFA* gene polymorphism.

| PROMs              | week | CC rs699947 |       | AC+AA rs699947 |       | <i>p</i><br>Mann-Whitney<br>U test |
|--------------------|------|-------------|-------|----------------|-------|------------------------------------|
|                    |      | median      | ± QD  | median         | ± QD  |                                    |
| VAS                | 0    | 5.00        | 1.50  | 6.00           | 1.75  | 0.631                              |
|                    | 2    | 4.00        | 1.00  | 3.00           | 1.50  | 0.475                              |
|                    | 4    | 4.00        | 1.50  | 3.00           | 1.50  | 0.436                              |
|                    | 8    | 3.50        | 1.50  | 3.00           | 1.50  | 0.334                              |
|                    | 12   | 2.50        | 2.00  | 2.50           | 1.50  | 0.703                              |
|                    | 24   | 3.00        | 2.50  | 2.00           | 2.00  | 0.855                              |
|                    | 52   | 2.00        | 2.50  | 1.00           | 2.00  | 0.807                              |
|                    | 104  | 1.00        | 2.00  | 1.00           | 1.50  | 0.777                              |
| ΔVAS (vs week 0)   | 2    | 1.00        | 1.50  | 1.25           | 1.50  | 0.332                              |
|                    | 4    | 1.50        | 2.00  | 2.00           | 1.50  | 0.287                              |
|                    | 8    | 2.00        | 2.00  | 3.00           | 2.00  | 0.286                              |
|                    | 12   | 2.50        | 2.50  | 3.00           | 2.00  | 0.574                              |
|                    | 24   | 2.50        | 2.50  | 3.00           | 2.00  | 0.699                              |
|                    | 52   | 2.00        | 2.50  | 4.00           | 2.00  | 0.387                              |
|                    | 104  | 4.00        | 2.50  | 4.00           | 2.00  | 0.844                              |
| QDASH              | 0    | 52.27       | 12.50 | 52.27          | 14.77 | 0.233                              |
|                    | 2    | 39.77       | 11.36 | 38.64          | 17.05 | 0.456                              |
|                    | 4    | 38.64       | 12.50 | 34.09          | 15.91 | 0.143                              |
|                    | 8    | 40.91       | 18.18 | 29.55          | 18.18 | 0.041                              |
|                    | 12   | 34.09       | 15.91 | 27.27          | 17.05 | 0.153                              |
|                    | 24   | 34.09       | 23.86 | 20.45          | 20.45 | 0.140                              |
|                    | 52   | 31.82       | 26.14 | 14.77          | 21.02 | 0.148                              |
|                    | 104  | 20.91       | 28.41 | 11.36          | 14.78 | 0.342                              |
| ΔQDASH (vs week 0) | 2    | 6.81        | 16.57 | 6.81           | 13.63 | 0.628                              |
|                    | 4    | 11.36       | 15.91 | 13.63          | 15.91 | 0.918                              |
|                    | 8    | 11.36       | 14.41 | 15.91          | 18.19 | 0.411                              |
|                    | 12   | 18.18       | 10.23 | 18.18          | 18.18 | 0.981                              |
|                    | 24   | 17.04       | 20.46 | 20.45          | 19.32 | 0.544                              |
|                    | 52   | 15.91       | 21.59 | 27.27          | 19.31 | 0.339                              |
|                    | 104  | 28.41       | 21.14 | 31.81          | 22.73 | 0.570                              |
| PRTEE              | 0    | 52.25       | 14.75 | 52.00          | 13.25 | 0.934                              |
|                    | 2    | 31.50       | 16.50 | 27.50          | 17.50 | 0.541                              |
|                    | 4    | 27.50       | 13.75 | 24.50          | 13.75 | 0.371                              |
|                    | 8    | 28.25       | 14.00 | 21.50          | 14.75 | 0.083                              |
|                    | 12   | 21.50       | 11.25 | 17.25          | 16.50 | 0.331                              |
|                    | 24   | 19.25       | 17.25 | 13.75          | 16.25 | 0.411                              |
|                    | 52   | 16.00       | 21.50 | 10.00          | 13.13 | 0.239                              |
|                    | 104  | 14.75       | 16.50 | 6.75           | 11.50 | 0.394                              |
| ΔPRTEE (vs week 0) | 2    | 12.50       | 13.75 | 17.25          | 11.50 | 0.435                              |
|                    | 4    | 19.75       | 14.75 | 22.00          | 11.75 | 0.391                              |
|                    | 8    | 17.75       | 15.50 | 29.00          | 14.25 | 0.111                              |
|                    | 12   | 25.25       | 12.00 | 29.50          | 18.50 | 0.659                              |
|                    | 24   | 26.50       | 15.50 | 31.50          | 20.50 | 0.326                              |
|                    | 52   | 25.50       | 15.50 | 33.50          | 18.75 | 0.181                              |
|                    | 104  | 37.75       | 18.50 | 38.00          | 16.50 | 0.453                              |

PROMs values in AA homozygotes and carriers of the C allele of the rs699947 *VEGFA* gene polymorphism.

| PROMs              | week | AA rs699947 |       | AC+CC rs699947 |       | <i>p</i><br>Mann-Whitney<br>U test |
|--------------------|------|-------------|-------|----------------|-------|------------------------------------|
|                    |      | median      | ± QD  | median         | ± QD  |                                    |
| VAS                | 0    | 6.00        | 2.00  | 6.00           | 1.50  | 0.287                              |
|                    | 2    | 4.00        | 1.00  | 3.50           | 1.50  | 0.274                              |
|                    | 4    | 3.00        | 1.00  | 3.00           | 1.50  | 0.615                              |
|                    | 8    | 3.00        | 1.50  | 3.00           | 2.00  | 0.665                              |
|                    | 12   | 3.00        | 1.50  | 2.00           | 2.00  | 0.435                              |
|                    | 24   | 2.00        | 2.50  | 2.00           | 2.00  | 0.720                              |
|                    | 52   | 2.00        | 2.00  | 1.00           | 2.00  | 0.436                              |
|                    | 104  | 1.00        | 1.50  | 1.00           | 1.50  | 0.520                              |
| ΔVAS (vs week 0)   | 2    | 1.00        | 1.50  | 1.00           | 1.50  | 0.555                              |
|                    | 4    | 3.00        | 1.25  | 2.00           | 2.00  | 0.033                              |
|                    | 8    | 3.00        | 2.00  | 2.00           | 2.00  | 0.122                              |
|                    | 12   | 3.00        | 1.75  | 2.00           | 2.50  | 0.141                              |
|                    | 24   | 3.00        | 1.50  | 2.00           | 2.00  | 0.249                              |
|                    | 52   | 4.00        | 2.50  | 3.25           | 2.00  | 0.809                              |
|                    | 104  | 4.50        | 2.25  | 4.00           | 2.00  | 0.666                              |
| QDASH              | 0    | 56.81       | 12.37 | 52.27          | 13.64 | 0.654                              |
|                    | 2    | 36.36       | 14.77 | 39.77          | 15.91 | 0.706                              |
|                    | 4    | 36.36       | 11.36 | 36.36          | 15.91 | 0.951                              |
|                    | 8    | 31.82       | 19.32 | 34.09          | 19.32 | 0.860                              |
|                    | 12   | 27.27       | 21.59 | 29.55          | 18.18 | 0.355                              |
|                    | 24   | 14.77       | 22.16 | 27.27          | 21.59 | 0.384                              |
|                    | 52   | 22.73       | 21.59 | 15.91          | 23.86 | 0.822                              |
|                    | 104  | 6.82        | 21.59 | 15.91          | 20.45 | 0.827                              |
| ΔQDASH (vs week 0) | 2    | 6.81        | 13.07 | 6.81           | 14.77 | 0.841                              |
|                    | 4    | 19.31       | 12.50 | 11.36          | 15.91 | 0.397                              |
|                    | 8    | 19.32       | 21.02 | 13.63          | 17.16 | 0.588                              |
|                    | 12   | 19.32       | 22.09 | 18.18          | 17.05 | 0.384                              |
|                    | 24   | 20.45       | 18.18 | 20.45          | 19.89 | 0.269                              |
|                    | 52   | 18.17       | 18.19 | 25.00          | 21.59 | 0.954                              |
|                    | 104  | 32.95       | 18.75 | 29.54          | 23.73 | 0.713                              |
| PRTEE              | 0    | 55.50       | 12.75 | 50.50          | 13.25 | 0.285                              |
|                    | 2    | 30.00       | 13.75 | 29.25          | 17.75 | 0.360                              |
|                    | 4    | 24.50       | 7.75  | 24.75          | 14.75 | 0.799                              |
|                    | 8    | 27.00       | 15.50 | 22.00          | 15.75 | 0.904                              |
|                    | 12   | 22.00       | 18.25 | 20.00          | 14.50 | 0.713                              |
|                    | 24   | 9.75        | 17.25 | 16.50          | 17.00 | 0.355                              |
|                    | 52   | 16.25       | 15.13 | 11.25          | 15.50 | 0.701                              |
|                    | 104  | 5.00        | 16.25 | 8.00           | 12.50 | 0.926                              |
| ΔPRTEE (vs week 0) | 2    | 17.50       | 10.75 | 14.50          | 12.00 | 0.424                              |
|                    | 4    | 29.00       | 13.88 | 20.50          | 13.00 | 0.157                              |
|                    | 8    | 31.25       | 16.63 | 24.50          | 17.25 | 0.211                              |
|                    | 12   | 32.75       | 20.63 | 27.00          | 15.25 | 0.290                              |
|                    | 24   | 32.50       | 17.50 | 27.75          | 17.63 | 0.145                              |
|                    | 52   | 32.00       | 17.00 | 33.75          | 18.00 | 0.724                              |
|                    | 104  | 37.25       | 18.38 | 38.00          | 17.00 | 0.571                              |

Legend: QD, Quartile Deviation; VAS, Visual Analog Scale; QDASH, quick version of Disabilities of the Arm, Shoulder and Hand score; PROM, Patient-Reported Outcome Measures; PRTEE, Patient-Rated Tennis Elbow Evaluation.



**Table S3.** PROMs values in carriers of different genotypes of the rs2010963 polymorphism of the *VEGFA* gene.PROMs values in GG homozygotes and carriers of the C allele of the rs2010963 *VEGFA* gene polymorphism.

| PROMs              | week | GG rs2010963 |       | CG+CC rs2010963 |       | <i>p</i><br>Mann-Whitney<br>U test |
|--------------------|------|--------------|-------|-----------------|-------|------------------------------------|
|                    |      | median       | ± QD  | median          | ± QD  |                                    |
| VAS                | 0    | 6.00         | 1.75  | 5.50            | 1.50  | 0.486                              |
|                    | 2    | 4.00         | 1.50  | 4.00            | 1.50  | 0.961                              |
|                    | 4    | 3.00         | 1.50  | 3.00            | 1.50  | 0.652                              |
|                    | 8    | 3.00         | 2.00  | 3.00            | 1.50  | 0.559                              |
|                    | 12   | 2.00         | 1.50  | 3.00            | 2.00  | 0.097                              |
|                    | 24   | 2.00         | 2.00  | 3.00            | 2.00  | 0.071                              |
|                    | 52   | 1.00         | 1.50  | 3.00            | 2.00  | 0.023 *                            |
|                    | 104  | 0.50         | 1.00  | 2.00            | 1.50  | 0.039                              |
| ΔVAS (vs week 0)   | 2    | 1.00         | 1.50  | 1.00            | 1.50  | 0.364                              |
|                    | 4    | 2.75         | 1.50  | 2.00            | 2.00  | 0.336                              |
|                    | 8    | 3.00         | 1.50  | 2.00            | 2.00  | 0.341                              |
|                    | 12   | 3.00         | 1.50  | 2.00            | 2.50  | 0.079                              |
|                    | 24   | 3.00         | 1.50  | 2.00            | 2.50  | 0.039                              |
|                    | 52   | 4.00         | 2.00  | 2.00            | 2.50  | 0.022 *                            |
|                    | 104  | 4.00         | 2.50  | 3.00            | 2.50  | 0.102                              |
| QDASH              | 0    | 52.27        | 10.09 | 47.50           | 13.64 | 0.386                              |
|                    | 2    | 36.36        | 18.18 | 43.18           | 15.91 | 0.249                              |
|                    | 4    | 34.09        | 17.05 | 37.50           | 12.50 | 0.191                              |
|                    | 8    | 29.55        | 20.45 | 36.36           | 14.77 | 0.124                              |
|                    | 12   | 20.45        | 20.45 | 32.95           | 15.91 | 0.012 *                            |
|                    | 24   | 15.91        | 22.73 | 31.82           | 21.59 | 0.030 *                            |
|                    | 52   | 13.64        | 22.73 | 22.73           | 21.59 | 0.220                              |
|                    | 104  | 4.55         | 12.50 | 22.73           | 21.59 | 0.013 *                            |
| ΔQDASH (vs week 0) | 2    | 11.36        | 13.64 | 2.27            | 13.63 | 0.047                              |
|                    | 4    | 20.45        | 14.13 | 7.95            | 10.23 | 0.035 *                            |
|                    | 8    | 20.45        | 18.18 | 11.36           | 15.91 | 0.049                              |
|                    | 12   | 27.27        | 19.32 | 14.77           | 14.77 | 0.010 *                            |
|                    | 24   | 28.36        | 18.75 | 13.64           | 20.56 | 0.012 *                            |
|                    | 52   | 29.54        | 18.75 | 15.91           | 21.59 | 0.087                              |
|                    | 104  | 40.90        | 18.19 | 22.72           | 17.05 | 0.007 *                            |
| PRTEE              | 0    | 52.00        | 12.25 | 52.25           | 15.00 | 0.868                              |
|                    | 2    | 30.00        | 16.00 | 29.25           | 16.50 | 0.531                              |
|                    | 4    | 23.50        | 15.00 | 25.50           | 13.00 | 0.350                              |
|                    | 8    | 20.50        | 16.00 | 24.25           | 13.75 | 0.188                              |
|                    | 12   | 15.25        | 16.50 | 21.50           | 13.25 | 0.039 *                            |
|                    | 24   | 10.00        | 17.00 | 20.50           | 17.75 | 0.029 *                            |
|                    | 52   | 6.00         | 13.00 | 15.00           | 15.25 | 0.109                              |
|                    | 104  | 2.50         | 8.25  | 14.25           | 13.50 | 0.017 *                            |
| ΔPRTEE (vs week 0) | 2    | 17.50        | 10.38 | 14.00           | 13.50 | 0.320                              |
|                    | 4    | 26.45        | 12.88 | 18.75           | 13.50 | 0.349                              |
|                    | 8    | 29.00        | 14.45 | 24.75           | 17.25 | 0.400                              |
|                    | 12   | 31.00        | 18.00 | 25.00           | 14.75 | 0.147                              |
|                    | 24   | 33.50        | 17.75 | 25.00           | 17.25 | 0.082                              |
|                    | 52   | 33.25        | 16.63 | 32.50           | 16.75 | 0.198                              |
|                    | 104  | 39.00        | 15.75 | 36.25           | 16.00 | 0.201                              |

\* - differences remaining significant ( $p < 0.050$ ) after removing diabetics from the analysis.

PROMs values in CC homozygotes and carriers of the G allele of the rs2010963 *VEGFA* gene polymorphism.

| PROMs              | week | CC rs2010963 |       | CG+GG rs2010963 |       | <i>p</i><br>Mann-Whitney<br>U test |
|--------------------|------|--------------|-------|-----------------|-------|------------------------------------|
|                    |      | median       | ± QD  | median          | ± QD  |                                    |
| VAS                | 0    | 5.00         | 0.50  | 6.00            | 2.00  | 0.217                              |
|                    | 2    | 4.50         | 1.00  | 4.00            | 1.50  | 0.418                              |
|                    | 4    | 3.50         | 1.50  | 3.00            | 1.50  | 0.790                              |
|                    | 8    | 4.50         | 2.00  | 3.00            | 1.50  | 0.457                              |
|                    | 12   | 4.00         | 2.00  | 2.00            | 1.50  | 0.738                              |
|                    | 24   | 3.50         | 2.50  | 2.00            | 2.00  | 0.939                              |
|                    | 52   | 4.00         | 2.50  | 1.00            | 2.00  | 0.251                              |
|                    | 104  | 0.50         | 2.75  | 1.00            | 1.50  | 0.962                              |
| ΔVAS (vs week 0)   | 2    | 0.00         | 1.50  | 1.00            | 1.50  | 0.064                              |
|                    | 4    | 0.50         | 1.50  | 2.00            | 1.50  | 0.263                              |
|                    | 8    | 0.50         | 1.50  | 3.00            | 2.00  | 0.153                              |
|                    | 12   | 2.50         | 1.50  | 3.00            | 2.00  | 0.527                              |
|                    | 24   | 1.50         | 2.00  | 3.00            | 2.00  | 0.206                              |
|                    | 52   | 1.00         | 2.00  | 4.00            | 2.50  | 0.056                              |
|                    | 104  | 2.50         | 2.50  | 4.00            | 2.00  | 0.230                              |
| QDASH              | 0    | 47.50        | 15.91 | 52.27           | 13.64 | 0.695                              |
|                    | 2    | 37.50        | 6.82  | 40.91           | 17.05 | 0.924                              |
|                    | 4    | 37.50        | 12.50 | 36.36           | 14.77 | 0.561                              |
|                    | 8    | 38.64        | 14.77 | 31.82           | 19.32 | 0.796                              |
|                    | 12   | 36.36        | 18.18 | 27.27           | 17.05 | 0.921                              |
|                    | 24   | 39.77        | 26.14 | 25.00           | 20.45 | 0.873                              |
|                    | 52   | 39.77        | 26.14 | 15.91           | 22.73 | 0.455                              |
|                    | 104  | 1.14         | 25.00 | 13.64           | 20.45 | 0.503                              |
| ΔQDASH (vs week 0) | 2    | 1.02         | 9.09  | 6.81            | 13.64 | 0.717                              |
|                    | 4    | 3.29         | 12.61 | 13.63           | 15.34 | 0.485                              |
|                    | 8    | 5.57         | 18.18 | 15.91           | 18.18 | 0.469                              |
|                    | 12   | 15.91        | 9.20  | 20.45           | 17.05 | 0.914                              |
|                    | 24   | 12.50        | 16.02 | 20.45           | 18.19 | 0.388                              |
|                    | 52   | 6.81         | 16.02 | 22.73           | 19.32 | 0.169                              |
|                    | 104  | 27.27        | 29.09 | 31.81           | 22.73 | 0.670                              |
| PRTEE              | 0    | 44.00        | 10.75 | 53.25           | 14.25 | 0.063                              |
|                    | 2    | 36.00        | 17.50 | 29.00           | 16.00 | 0.805                              |
|                    | 4    | 26.25        | 16.50 | 24.50           | 13.00 | 0.700                              |
|                    | 8    | 25.75        | 17.25 | 22.00           | 15.00 | 0.511                              |
|                    | 12   | 22.00        | 12.50 | 19.75           | 15.50 | 0.780                              |
|                    | 24   | 24.25        | 20.50 | 14.75           | 16.25 | 0.820                              |
|                    | 52   | 23.75        | 22.50 | 11.50           | 14.13 | 0.455                              |
|                    | 104  | 0.00         | 21.75 | 7.50            | 12.63 | 0.505                              |
| ΔPRTEE (vs week 0) | 2    | 10.25        | 10.75 | 16.75           | 12.88 | 0.044                              |
|                    | 4    | 5.75         | 12.50 | 21.75           | 13.13 | 0.057                              |
|                    | 8    | 9.00         | 10.25 | 28.00           | 15.45 | 0.038                              |
|                    | 12   | 22.75        | 8.25  | 29.00           | 17.50 | 0.446                              |
|                    | 24   | 18.75        | 11.25 | 31.50           | 19.25 | 0.113                              |
|                    | 52   | 16.50        | 9.75  | 34.00           | 18.75 | 0.024                              |
|                    | 104  | 26.75        | 16.75 | 38.50           | 16.50 | 0.123                              |

Legend: QD, Quartile Deviation; VAS, Visual Analog Scale; QDASH, quick version of Disabilities of the Arm, Shoulder and Hand score; PROM, Patient-Reported Outcome Measures; PRTEE, Patient-Rated Tennis Elbow Evaluation.

**Table S4.** PROMs values in carriers of different genotypes of the rs1413711 polymorphism of the *VEGFA* gene.PROMs values in TT homozygotes and carriers of the C allele of the rs1413711 *VEGFA* gene polymorphism.

| PROMs              | week | TT rs1413711 |       | CT+CC rs1413711 |       | <i>p</i><br>Mann-Whitney<br>U test |
|--------------------|------|--------------|-------|-----------------|-------|------------------------------------|
|                    |      | median       | ± QD  | median          | ± QD  |                                    |
| VAS                | 0    | 6.00         | 2.00  | 6.00            | 1.50  | 0.618                              |
|                    | 2    | 4.50         | 1.00  | 3.00            | 1.50  | 0.145                              |
|                    | 4    | 3.00         | 1.00  | 3.00            | 1.50  | 0.687                              |
|                    | 8    | 2.50         | 1.50  | 3.00            | 2.00  | 0.447                              |
|                    | 12   | 2.00         | 2.00  | 3.00            | 2.00  | 0.143                              |
|                    | 24   | 2.00         | 2.00  | 2.00            | 2.00  | 0.354                              |
|                    | 52   | 2.00         | 2.00  | 2.00            | 2.00  | 0.936                              |
|                    | 104  | 1.00         | 1.50  | 1.00            | 1.50  | 0.586                              |
| ΔVAS (vs week 0)   | 2    | 1.00         | 1.50  | 1.00            | 1.50  | 0.766                              |
|                    | 4    | 3.00         | 1.50  | 2.00            | 2.00  | 0.152                              |
|                    | 8    | 3.00         | 2.00  | 2.00            | 2.00  | 0.215                              |
|                    | 12   | 3.00         | 1.50  | 2.00            | 2.00  | 0.138                              |
|                    | 24   | 3.00         | 1.50  | 2.00            | 2.00  | 0.219                              |
|                    | 52   | 4.00         | 2.25  | 3.00            | 2.00  | 0.587                              |
|                    | 104  | 5.00         | 2.00  | 4.00            | 2.00  | 0.878                              |
| QDASH              | 0    | 52.27        | 11.37 | 52.27           | 13.64 | 0.918                              |
|                    | 2    | 44.32        | 15.91 | 38.64           | 14.77 | 0.336                              |
|                    | 4    | 36.36        | 9.09  | 34.09           | 14.77 | 0.637                              |
|                    | 8    | 29.55        | 19.32 | 34.09           | 19.32 | 0.619                              |
|                    | 12   | 21.59        | 20.45 | 29.55           | 19.32 | 0.116                              |
|                    | 24   | 13.64        | 20.45 | 27.27           | 21.59 | 0.142                              |
|                    | 52   | 20.45        | 18.18 | 18.18           | 22.73 | 0.589                              |
|                    | 104  | 6.82         | 21.59 | 17.04           | 20.45 | 0.552                              |
| ΔQDASH (vs week 0) | 2    | 4.54         | 10.23 | 6.81            | 14.77 | 0.531                              |
|                    | 4    | 17.27        | 11.36 | 11.36           | 15.91 | 0.898                              |
|                    | 8    | 18.18        | 18.18 | 14.77           | 17.16 | 0.663                              |
|                    | 12   | 25.00        | 20.45 | 18.18           | 17.05 | 0.227                              |
|                    | 24   | 23.86        | 16.54 | 20.45           | 20.45 | 0.147                              |
|                    | 52   | 21.59        | 16.48 | 22.72           | 21.59 | 0.740                              |
|                    | 104  | 34.09        | 18.18 | 29.54           | 23.73 | 0.586                              |
| PRTEE              | 0    | 54.50        | 11.30 | 50.75           | 14.50 | 0.490                              |
|                    | 2    | 35.00        | 14.50 | 28.00           | 16.25 | 0.183                              |
|                    | 4    | 26.25        | 12.25 | 24.50           | 14.25 | 0.722                              |
|                    | 8    | 26.75        | 16.00 | 22.00           | 15.75 | 0.589                              |
|                    | 12   | 15.50        | 16.50 | 20.50           | 14.25 | 0.265                              |
|                    | 24   | 9.50         | 16.25 | 18.00           | 17.50 | 0.118                              |
|                    | 52   | 12.50        | 10.25 | 11.50           | 15.75 | 0.651                              |
|                    | 104  | 4.50         | 14.00 | 8.25            | 12.75 | 0.595                              |
| ΔPRTEE (vs week 0) | 2    | 17.00        | 8.75  | 14.50           | 13.00 | 0.942                              |
|                    | 4    | 27.00        | 10.50 | 20.50           | 13.25 | 0.333                              |
|                    | 8    | 31.00        | 15.00 | 24.50           | 17.25 | 0.211                              |
|                    | 12   | 36.50        | 15.75 | 26.75           | 15.50 | 0.089                              |
|                    | 24   | 34.75        | 14.50 | 27.50           | 17.50 | 0.048                              |
|                    | 52   | 32.75        | 17.13 | 33.00           | 18.00 | 0.304                              |
|                    | 104  | 39.00        | 16.75 | 38.00           | 17.00 | 0.381                              |

PROMs values in CC homozygotes and carriers of the T allele of the rs1413711 *VEGFA* gene polymorphism.

| PROMs              | week | CC rs1413711 |       | CT+TT rs1413711 |       | <i>p</i><br>Mann-Whitney<br>U test |
|--------------------|------|--------------|-------|-----------------|-------|------------------------------------|
|                    |      | median       | ± QD  | median          | ± QD  |                                    |
| VAS                | 0    | 5.00         | 1.50  | 6.00            | 1.75  | 0.631                              |
|                    | 2    | 4.00         | 1.00  | 3.00            | 1.50  | 0.475                              |
|                    | 4    | 4.00         | 1.50  | 3.00            | 1.50  | 0.436                              |
|                    | 8    | 3.50         | 1.50  | 3.00            | 1.50  | 0.334                              |
|                    | 12   | 2.50         | 2.00  | 2.50            | 1.50  | 0.703                              |
|                    | 24   | 3.00         | 2.50  | 2.00            | 2.00  | 0.855                              |
|                    | 52   | 2.00         | 2.50  | 1.00            | 2.00  | 0.807                              |
|                    | 104  | 1.00         | 2.00  | 1.00            | 1.50  | 0.777                              |
| ΔVAS (vs week 0)   | 2    | 1.00         | 1.50  | 1.25            | 1.50  | 0.332                              |
|                    | 4    | 1.50         | 2.00  | 2.00            | 1.50  | 0.287                              |
|                    | 8    | 2.00         | 2.00  | 3.00            | 2.00  | 0.286                              |
|                    | 12   | 2.50         | 2.50  | 3.00            | 2.00  | 0.574                              |
|                    | 24   | 2.50         | 2.50  | 3.00            | 2.00  | 0.699                              |
|                    | 52   | 2.00         | 2.50  | 4.00            | 2.00  | 0.387                              |
|                    | 104  | 4.00         | 2.50  | 4.00            | 2.00  | 0.844                              |
| QDASH              | 0    | 52.27        | 12.50 | 52.27           | 14.77 | 0.233                              |
|                    | 2    | 39.77        | 11.36 | 38.64           | 17.05 | 0.456                              |
|                    | 4    | 38.64        | 12.50 | 34.09           | 15.91 | 0.143                              |
|                    | 8    | 40.91        | 18.18 | 29.55           | 18.18 | 0.041                              |
|                    | 12   | 34.09        | 15.91 | 27.27           | 17.05 | 0.153                              |
|                    | 24   | 34.09        | 23.86 | 20.45           | 20.45 | 0.140                              |
|                    | 52   | 31.82        | 26.14 | 14.77           | 21.02 | 0.148                              |
|                    | 104  | 20.91        | 28.41 | 11.36           | 14.78 | 0.342                              |
| ΔQDASH (vs week 0) | 2    | 6.81         | 16.57 | 6.81            | 13.63 | 0.628                              |
|                    | 4    | 11.36        | 15.91 | 13.63           | 15.91 | 0.918                              |
|                    | 8    | 11.36        | 14.41 | 15.91           | 18.19 | 0.411                              |
|                    | 12   | 18.18        | 10.23 | 18.18           | 18.18 | 0.981                              |
|                    | 24   | 17.04        | 20.46 | 20.45           | 19.32 | 0.544                              |
|                    | 52   | 15.91        | 21.59 | 27.27           | 19.31 | 0.339                              |
|                    | 104  | 28.41        | 21.14 | 31.81           | 22.73 | 0.570                              |
| PRTEE              | 0    | 52.25        | 14.75 | 52.00           | 13.25 | 0.934                              |
|                    | 2    | 31.50        | 16.50 | 27.50           | 17.50 | 0.541                              |
|                    | 4    | 27.50        | 13.75 | 24.50           | 13.75 | 0.371                              |
|                    | 8    | 28.25        | 14.00 | 21.50           | 14.75 | 0.083                              |
|                    | 12   | 21.50        | 11.25 | 17.25           | 16.50 | 0.331                              |
|                    | 24   | 19.25        | 17.25 | 13.75           | 16.25 | 0.411                              |
|                    | 52   | 16.00        | 21.50 | 10.00           | 13.13 | 0.239                              |
|                    | 104  | 14.75        | 16.50 | 6.75            | 11.50 | 0.394                              |
| ΔPRTEE (vs week 0) | 2    | 12.50        | 13.75 | 17.25           | 11.50 | 0.435                              |
|                    | 4    | 19.75        | 14.75 | 22.00           | 11.75 | 0.391                              |
|                    | 8    | 17.75        | 15.50 | 29.00           | 14.25 | 0.111                              |
|                    | 12   | 25.25        | 12.00 | 29.50           | 18.50 | 0.659                              |
|                    | 24   | 26.50        | 15.50 | 31.50           | 20.50 | 0.326                              |
|                    | 52   | 25.50        | 15.50 | 33.50           | 18.75 | 0.181                              |
|                    | 104  | 37.75        | 18.50 | 38.00           | 16.50 | 0.453                              |

Legend: QD, Quartile Deviation; VAS, Visual Analog Scale; QDASH, quick version of Disabilities of the Arm, Shoulder and Hand score; PROM, Patient-Reported Outcome Measures; PRTEE, Patient-Rated Tennis Elbow Evaluation.

**Table S5.** PROMs values in carriers of different genotypes of the rs3024998 polymorphism of the *VEGFA* gene.PROMs values in TT homozygotes and carriers of the C allele of the rs3024998 *VEGFA* gene polymorphism.

| PROMs              | week | TT rs3024998 |       | CT+CC rs3024998 |       | <i>p</i><br>Mann-Whitney<br>U test |
|--------------------|------|--------------|-------|-----------------|-------|------------------------------------|
|                    |      | median       | ± QD  | median          | ± QD  |                                    |
| VAS                | 0    | 5.00         | 0.50  | 6.00            | 2.00  | 0.217                              |
|                    | 2    | 4.50         | 1.00  | 4.00            | 1.50  | 0.418                              |
|                    | 4    | 3.50         | 1.50  | 3.00            | 1.50  | 0.790                              |
|                    | 8    | 4.50         | 2.00  | 3.00            | 1.50  | 0.457                              |
|                    | 12   | 4.00         | 2.00  | 2.00            | 1.50  | 0.738                              |
|                    | 24   | 3.50         | 2.50  | 2.00            | 2.00  | 0.939                              |
|                    | 52   | 4.00         | 2.50  | 1.00            | 2.00  | 0.251                              |
|                    | 104  | 0.50         | 2.75  | 1.00            | 1.50  | 0.962                              |
| ΔVAS (vs week 0)   | 2    | 0.00         | 1.50  | 1.00            | 1.50  | 0.064                              |
|                    | 4    | 0.50         | 1.50  | 2.00            | 1.50  | 0.263                              |
|                    | 8    | 0.50         | 1.50  | 3.00            | 2.00  | 0.153                              |
|                    | 12   | 2.50         | 1.50  | 3.00            | 2.00  | 0.527                              |
|                    | 24   | 1.50         | 2.00  | 3.00            | 2.00  | 0.206                              |
|                    | 52   | 1.00         | 2.00  | 4.00            | 2.50  | 0.056                              |
|                    | 104  | 2.50         | 2.50  | 4.00            | 2.00  | 0.230                              |
| QDASH              | 0    | 47.50        | 15.91 | 52.27           | 13.64 | 0.695                              |
|                    | 2    | 37.50        | 6.82  | 40.91           | 17.05 | 0.924                              |
|                    | 4    | 37.50        | 12.50 | 36.36           | 14.77 | 0.561                              |
|                    | 8    | 38.64        | 14.77 | 31.82           | 19.32 | 0.796                              |
|                    | 12   | 36.36        | 18.18 | 27.27           | 17.05 | 0.921                              |
|                    | 24   | 39.77        | 26.14 | 25.00           | 20.45 | 0.873                              |
|                    | 52   | 39.77        | 26.14 | 15.91           | 22.73 | 0.455                              |
|                    | 104  | 1.14         | 25.00 | 13.64           | 20.45 | 0.503                              |
| ΔQDASH (vs week 0) | 2    | 1.02         | 9.09  | 6.81            | 13.64 | 0.717                              |
|                    | 4    | 3.29         | 12.61 | 13.63           | 15.34 | 0.485                              |
|                    | 8    | 5.57         | 18.18 | 15.91           | 18.18 | 0.469                              |
|                    | 12   | 15.91        | 9.20  | 20.45           | 17.05 | 0.914                              |
|                    | 24   | 12.50        | 16.02 | 20.45           | 18.19 | 0.388                              |
|                    | 52   | 6.81         | 16.02 | 22.73           | 19.32 | 0.169                              |
|                    | 104  | 27.27        | 29.09 | 31.81           | 22.73 | 0.670                              |
| PRTEE              | 0    | 44.00        | 10.75 | 53.25           | 14.25 | 0.063                              |
|                    | 2    | 36.00        | 17.50 | 29.00           | 16.00 | 0.805                              |
|                    | 4    | 26.25        | 16.50 | 24.50           | 13.00 | 0.700                              |
|                    | 8    | 25.75        | 17.25 | 22.00           | 15.00 | 0.511                              |
|                    | 12   | 22.00        | 12.50 | 19.75           | 15.50 | 0.780                              |
|                    | 24   | 24.25        | 20.50 | 14.75           | 16.25 | 0.820                              |
|                    | 52   | 23.75        | 22.50 | 11.50           | 14.13 | 0.455                              |
|                    | 104  | 0.00         | 21.75 | 7.50            | 12.63 | 0.505                              |
| ΔPRTEE (vs week 0) | 2    | 10.25        | 10.75 | 16.75           | 12.88 | 0.044                              |
|                    | 4    | 5.75         | 12.50 | 21.75           | 13.13 | 0.057                              |
|                    | 8    | 9.00         | 10.25 | 28.00           | 15.45 | 0.038                              |
|                    | 12   | 22.75        | 8.25  | 29.00           | 17.50 | 0.446                              |
|                    | 24   | 18.75        | 11.25 | 31.50           | 19.25 | 0.113                              |
|                    | 52   | 16.50        | 9.75  | 34.00           | 18.75 | 0.024                              |
|                    | 104  | 26.75        | 16.75 | 38.50           | 16.50 | 0.123                              |

PROMs values in CC homozygotes and carriers of the T allele of the rs3024998 *VEGFA* gene polymorphism.

| PROMs              | week | CC rs3024998 |       | CT+TTrs3024998 |       | <i>p</i><br>Mann-Whitney<br>U test |
|--------------------|------|--------------|-------|----------------|-------|------------------------------------|
|                    |      | median       | ± QD  | median         | ± QD  |                                    |
| VAS                | 0    | 6.00         | 1.75  | 5.00           | 1.50  | 0.444                              |
|                    | 2    | 4.00         | 1.50  | 4.00           | 1.50  | 0.755                              |
|                    | 4    | 3.00         | 1.50  | 3.00           | 1.50  | 0.824                              |
|                    | 8    | 3.00         | 2.00  | 3.00           | 1.50  | 0.634                              |
|                    | 12   | 2.00         | 1.50  | 3.00           | 2.00  | 0.105                              |
|                    | 24   | 1.50         | 2.00  | 3.00           | 2.00  | 0.054                              |
|                    | 52   | 1.00         | 1.50  | 2.50           | 2.00  | 0.027 *                            |
|                    | 104  | 1.00         | 1.50  | 1.00           | 1.50  | 0.109                              |
| ΔVAS (vs week 0)   | 2    | 1.00         | 1.50  | 1.00           | 1.50  | 0.553                              |
|                    | 4    | 3.00         | 1.50  | 2.00           | 2.00  | 0.422                              |
|                    | 8    | 3.00         | 1.63  | 2.00           | 2.00  | 0.404                              |
|                    | 12   | 3.25         | 1.88  | 2.00           | 2.50  | 0.098                              |
|                    | 24   | 3.00         | 1.50  | 2.00           | 2.25  | 0.040                              |
|                    | 52   | 4.00         | 2.50  | 2.00           | 2.50  | 0.028 *                            |
|                    | 104  | 4.25         | 2.50  | 3.00           | 2.50  | 0.145                              |
| QDASH              | 0    | 52.27        | 10.09 | 47.72          | 13.64 | 0.466                              |
|                    | 2    | 36.36        | 17.78 | 43.18          | 14.77 | 0.609                              |
|                    | 4    | 36.36        | 17.61 | 36.36          | 12.50 | 0.416                              |
|                    | 8    | 29.55        | 20.45 | 36.36          | 15.91 | 0.180                              |
|                    | 12   | 22.73        | 20.45 | 31.82          | 15.91 | 0.018 *                            |
|                    | 24   | 13.64        | 23.86 | 31.82          | 18.75 | 0.020 *                            |
|                    | 52   | 14.77        | 23.30 | 21.59          | 21.59 | 0.207                              |
|                    | 104  | 4.55         | 12.50 | 22.73          | 21.59 | 0.031 *                            |
| ΔQDASH (vs week 0) | 2    | 11.36        | 12.50 | 2.27           | 12.59 | 0.202                              |
|                    | 4    | 18.18        | 14.64 | 9.09           | 13.64 | 0.123                              |
|                    | 8    | 19.32        | 18.75 | 11.36          | 18.18 | 0.092                              |
|                    | 12   | 26.13        | 20.45 | 15.90          | 14.77 | 0.021 *                            |
|                    | 24   | 27.27        | 19.31 | 14.77          | 19.93 | 0.012 *                            |
|                    | 52   | 29.54        | 19.32 | 17.04          | 22.73 | 0.119                              |
|                    | 104  | 38.63        | 18.75 | 22.72          | 18.18 | 0.016 *                            |
| PRTEE              | 0    | 53.00        | 12.25 | 51.50          | 15.50 | 0.908                              |
|                    | 2    | 33.25        | 16.38 | 28.00          | 17.00 | 0.978                              |
|                    | 4    | 24.50        | 17.13 | 25.00          | 11.75 | 0.648                              |
|                    | 8    | 21.00        | 16.00 | 24.00          | 14.50 | 0.296                              |
|                    | 12   | 15.50        | 16.50 | 21.50          | 13.50 | 0.053 (0.047)*                     |
|                    | 24   | 10.00        | 17.25 | 20.00          | 17.13 | 0.023 *                            |
|                    | 52   | 8.25         | 14.25 | 14.50          | 15.25 | 0.089                              |
|                    | 104  | 2.50         | 8.25  | 14.00          | 14.00 | 0.034 *                            |
| ΔPRTEE (vs week 0) | 2    | 17.50        | 11.00 | 14.50          | 13.75 | 0.678                              |
|                    | 4    | 25.00        | 14.25 | 20.50          | 13.50 | 0.513                              |
|                    | 8    | 28.75        | 14.98 | 24.50          | 17.25 | 0.435                              |
|                    | 12   | 32.75        | 18.50 | 26.50          | 14.25 | 0.126                              |
|                    | 24   | 34.50        | 19.00 | 25.50          | 16.25 | 0.056                              |
|                    | 52   | 33.50        | 17.00 | 32.25          | 16.50 | 0.150                              |
|                    | 104  | 39.00        | 16.75 | 36.50          | 15.50 | 0.180                              |

\* - differences significant ( $p < 0.050$ ) after removing diabetics from the analysis.

Legend: QD, Quartile Deviation; VAS, Visual Analog Scale; QDASH, quick version of Disabilities of the Arm, Shoulder and Hand score; PROM, Patient-Reported Outcome Measures; PRTEE, Patient-Rated Tennis Elbow Evaluation.

**Table S6.** PROMs values in carriers of different genotypes of the rs3025021 polymorphism of the *VEGFA* gene.PROMs values in TT homozygotes and carriers of the C allele of the rs3025021 *VEGFA* gene polymorphism.

| PROMs              | week | TT rs3025021 |       | CT+CC rs3025021 |       | <i>p</i><br>Mann-Whitney<br>U test |
|--------------------|------|--------------|-------|-----------------|-------|------------------------------------|
|                    |      | median       | ± QD  | median          | ± QD  |                                    |
| VAS                | 0    | 6.50         | 1.00  | 6.00            | 1.50  | 0.319                              |
|                    | 2    | 4.50         | 1.50  | 4.00            | 1.50  | 0.255                              |
|                    | 4    | 3.50         | 0.50  | 3.00            | 1.50  | 0.934                              |
|                    | 8    | 3.50         | 3.00  | 3.00            | 2.00  | 0.718                              |
|                    | 12   | 1.50         | 1.50  | 3.00            | 1.50  | 0.602                              |
|                    | 24   | 3.50         | 2.50  | 2.00            | 2.00  | 0.070                              |
|                    | 52   | 1.00         | 1.00  | 2.00            | 2.00  | 0.986                              |
|                    | 104  | 0.00         | 0.50  | 1.00            | 1.50  | 0.081                              |
| ΔVAS (vs week 0)   | 2    | 1.50         | 2.50  | 1.00            | 1.50  | 0.747                              |
|                    | 4    | 3.00         | 2.50  | 2.00            | 2.00  | 0.390                              |
|                    | 8    | 4.00         | 3.00  | 2.00            | 2.00  | 0.663                              |
|                    | 12   | 4.50         | 3.50  | 3.00            | 2.00  | 0.475                              |
|                    | 24   | 2.50         | 3.00  | 3.00            | 2.00  | 0.558                              |
|                    | 52   | 5.00         | 2.50  | 3.00            | 2.00  | 0.507                              |
|                    | 104  | 6.00         | 1.00  | 4.00            | 2.00  | 0.061                              |
| QDASH              | 0    | 52.27        | 15.91 | 52.27           | 12.50 | 0.870                              |
|                    | 2    | 47.73        | 17.05 | 38.64           | 15.91 | 0.811                              |
|                    | 4    | 32.95        | 11.36 | 36.36           | 14.77 | 0.965                              |
|                    | 8    | 29.55        | 19.32 | 34.09           | 19.32 | 0.826                              |
|                    | 12   | 25.00        | 14.77 | 29.55           | 17.05 | 0.757                              |
|                    | 24   | 25.00        | 15.91 | 25.00           | 22.73 | 0.566                              |
|                    | 52   | 11.36        | 9.09  | 20.45           | 23.86 | 0.556                              |
|                    | 104  | 5.68         | 6.82  | 15.91           | 21.59 | 0.281                              |
| ΔQDASH (vs week 0) | 2    | 10.22        | 15.91 | 6.81            | 13.64 | 0.889                              |
|                    | 4    | 6.82         | 20.32 | 12.50           | 15.34 | 0.830                              |
|                    | 8    | 15.90        | 29.41 | 15.90           | 17.05 | 0.941                              |
|                    | 12   | 23.86        | 29.55 | 18.18           | 15.91 | 0.808                              |
|                    | 24   | 18.17        | 6.82  | 20.45           | 19.32 | 0.710                              |
|                    | 52   | 21.59        | 18.18 | 22.72           | 21.59 | 0.603                              |
|                    | 104  | 42.04        | 18.18 | 29.55           | 22.72 | 0.445                              |
| PRTEE              | 0    | 57.75        | 16.50 | 51.50           | 13.25 | 0.280                              |
|                    | 2    | 34.00        | 6.00  | 29.00           | 16.00 | 0.842                              |
|                    | 4    | 24.00        | 12.25 | 25.00           | 14.00 | 0.742                              |
|                    | 8    | 20.50        | 17.75 | 22.00           | 15.75 | 0.737                              |
|                    | 12   | 10.75        | 11.75 | 20.50           | 15.00 | 0.579                              |
|                    | 24   | 14.25        | 15.75 | 14.75           | 17.25 | 0.575                              |
|                    | 52   | 6.25         | 8.50  | 12.25           | 15.63 | 0.979                              |
|                    | 104  | 1.50         | 3.50  | 8.00            | 14.00 | 0.283                              |
| ΔPRTEE (vs week 0) | 2    | 17.50        | 16.50 | 14.50           | 11.50 | 0.385                              |
|                    | 4    | 28.25        | 23.00 | 21.00           | 13.00 | 0.345                              |
|                    | 8    | 44.00        | 34.50 | 25.50           | 14.50 | 0.372                              |
|                    | 12   | 43.00        | 28.00 | 27.00           | 15.25 | 0.189                              |
|                    | 24   | 34.75        | 13.75 | 30.50           | 18.00 | 0.420                              |
|                    | 52   | 37.25        | 17.50 | 32.50           | 18.00 | 0.287                              |
|                    | 104  | 50.50        | 16.25 | 37.50           | 16.50 | 0.079                              |

PROMs values in CC homozygotes and carriers of the T allele of the rs3025021 *VEGFA* gene polymorphism.

| PROMs              |      | CC rs3025021 |       | CT+TT rs3025021 |       | <i>p</i><br>Mann-Whitney<br>U test |
|--------------------|------|--------------|-------|-----------------|-------|------------------------------------|
|                    |      | median       | ± QD  | median          | ± QD  |                                    |
| VAS                | week |              |       |                 |       |                                    |
|                    | 0    | 5.00         | 1.50  | 6.00            | 2.00  | 0.125                              |
|                    | 2    | 3.00         | 1.50  | 4.00            | 1.50  | 0.338                              |
|                    | 4    | 3.00         | 1.50  | 3.00            | 1.50  | 0.617                              |
|                    | 8    | 3.00         | 1.75  | 3.00            | 2.00  | 0.976                              |
|                    | 12   | 2.50         | 1.50  | 2.50            | 1.75  | 0.479                              |
|                    | 24   | 2.00         | 1.50  | 2.00            | 2.00  | 0.494                              |
|                    | 52   | 2.00         | 2.00  | 1.00            | 2.50  | 0.977                              |
|                    | 104  | 1.00         | 1.50  | 1.00            | 1.50  | 0.230                              |
| ΔVAS (vs week 0)   | 2    | 1.00         | 1.50  | 1.00            | 2.00  | 0.994                              |
|                    | 4    | 2.25         | 1.50  | 2.00            | 2.00  | 0.770                              |
|                    | 8    | 3.00         | 2.00  | 2.00            | 2.50  | 0.421                              |
|                    | 12   | 3.00         | 1.50  | 2.00            | 2.00  | 0.829                              |
|                    | 24   | 3.00         | 1.50  | 2.00            | 2.00  | 0.847                              |
|                    | 52   | 4.00         | 2.00  | 3.00            | 2.50  | 0.758                              |
|                    | 104  | 4.00         | 1.50  | 4.00            | 2.50  | 0.410                              |
| QDASH              | 0    | 47.72        | 12.51 | 52.27           | 13.07 | 0.342                              |
|                    | 2    | 34.09        | 14.77 | 43.18           | 17.05 | 0.178                              |
|                    | 4    | 34.09        | 14.77 | 36.36           | 14.77 | 0.664                              |
|                    | 8    | 29.55        | 18.75 | 34.09           | 17.05 | 0.454                              |
|                    | 12   | 26.14        | 16.48 | 29.55           | 19.32 | 0.313                              |
|                    | 24   | 22.73        | 21.59 | 27.27           | 20.46 | 0.500                              |
|                    | 52   | 20.45        | 21.59 | 18.18           | 25.00 | 0.920                              |
|                    | 104  | 15.91        | 17.05 | 11.36           | 21.59 | 0.663                              |
| ΔQDASH (vs week 0) | 2    | 5.68         | 12.50 | 6.81            | 15.34 | 0.756                              |
|                    | 4    | 11.36        | 11.36 | 13.63           | 17.05 | 0.658                              |
|                    | 8    | 13.63        | 15.92 | 15.91           | 19.94 | 0.622                              |
|                    | 12   | 20.45        | 15.91 | 17.07           | 19.72 | 0.929                              |
|                    | 24   | 18.18        | 17.04 | 20.45           | 21.59 | 0.881                              |
|                    | 52   | 28.36        | 17.05 | 20.45           | 25.00 | 0.868                              |
|                    | 104  | 29.54        | 10.23 | 31.82           | 22.73 | 0.718                              |
| PRTEE              | 0    | 48.25        | 10.25 | 54.00           | 15.13 | 0.122                              |
|                    | 2    | 24.50        | 13.00 | 32.00           | 16.50 | 0.237                              |
|                    | 4    | 25.50        | 13.75 | 24.25           | 14.50 | 0.841                              |
|                    | 8    | 21.75        | 16.50 | 24.25           | 15.88 | 0.762                              |
|                    | 12   | 18.25        | 13.75 | 21.50           | 15.38 | 0.354                              |
|                    | 24   | 13.50        | 16.75 | 15.00           | 18.50 | 0.609                              |
|                    | 52   | 11.50        | 13.00 | 13.00           | 17.50 | 0.453                              |
|                    | 104  | 7.50         | 11.75 | 7.00            | 12.75 | 0.779                              |
| ΔPRTEE (vs week 0) | 2    | 17.00        | 9.75  | 14.25           | 14.50 | 0.761                              |
|                    | 4    | 22.00        | 12.25 | 21.00           | 15.00 | 0.488                              |
|                    | 8    | 24.50        | 15.00 | 28.00           | 16.63 | 0.232                              |
|                    | 12   | 30.50        | 14.25 | 26.75           | 17.38 | 0.917                              |
|                    | 24   | 30.75        | 14.13 | 30.50           | 21.50 | 0.691                              |
|                    | 52   | 33.00        | 12.75 | 33.00           | 19.50 | 0.961                              |
|                    | 104  | 37.25        | 13.75 | 38.00           | 18.00 | 0.459                              |

Legend: QD, Quartile Deviation; VAS, Visual Analog Scale; QDASH, quick version of Disabilities of the Arm, Shoulder and Hand score; PROM, Patient-Reported Outcome Measures; PRTEE, Patient-Rated Tennis Elbow Evaluation.



**Table S7.** Whole blood (WB) and platelet-rich plasma (PRP) parameters values in individuals with particular genotypes of the *VEGFA* gene polymorphisms (additive model).

| Parameter               | Source | Genotypes of rs699947 |       |        |       |        |       | P value             |          |          |          |
|-------------------------|--------|-----------------------|-------|--------|-------|--------|-------|---------------------|----------|----------|----------|
|                         |        | AA                    |       | AC     |       | CC     |       | Kruskal-Wallis test | AA vs AC | AA vs CC | AC vs CC |
|                         |        | Median                | ±QD   | Median | ±QD   | Median | ±QD   |                     |          |          |          |
| PLT 10 <sup>9</sup> /l  | WB     | 221.50                | 38.00 | 238.00 | 39.00 | 264.00 | 28.00 | 0.019               | 0.069    | 0.022    | 1.000    |
| PCT ml/l                | WB     | 2.04                  | 0.31  | 2.33   | 0.39  | 2.35   | 0.28  | 0.107               |          |          |          |
| MPV fl                  | WB     | 9.70                  | 0.70  | 9      | 0.70  | 8.9    | 0.55  | 0.041               |          |          |          |
| PDW fl                  | WB     | 16.15                 | 0.25  | 16.1   | 0.15  | 16     | 0.15  | 0.641               |          |          |          |
| WBC 10 <sup>9</sup> /l  | WB     | 5.38                  | 1.01  | 6.28   | 1.05  | 6.8    | 1.15  | 0.044               | 0.181    | 0.043    | 1.000    |
| RBC 10 <sup>12</sup> /l | WB     | 4.73                  | 0.41  | 4.68   | 0.27  | 4.54   | 0.27  | 0.281               |          |          |          |
| EOS%                    | WB     | 2.60                  | 1.00  | 2.3    | 1.05  | 2.1    | 0.70  | 0.266               |          |          |          |
| EOS# 10 <sup>9</sup> /L | WB     | 0.14                  | 0.04  | 0.14   | 0.08  | 0.14   | 0.06  | 0.942               |          |          |          |
| PLT 10 <sup>9</sup> /l  | PRP    | 349.00                | 84.00 | 335    | 50.50 | 351.5  | 54.50 | 0.479               |          |          |          |
| PCT ml/l                | PRP    | 0.31                  | 0.07  | 0.285  | 0.07  | 0.31   | 0.05  | 0.287               |          |          |          |
| MPV fl                  | PRP    | 8.80                  | 0.55  | 8.5    | 0.40  | 8.7    | 0.40  | 0.028               | 0.023    | 0.281    | 1.000    |
| PDW fl                  | PRP    | 14.70                 | 0.25  | 14.5   | 0.20  | 14.6   | 0.25  | 0.089               |          |          |          |

  

| Parameter               | Source | Genotypes of rs2010963 |       |        |       |        |       | P value             |          |          |          |
|-------------------------|--------|------------------------|-------|--------|-------|--------|-------|---------------------|----------|----------|----------|
|                         |        | CC                     |       | CG     |       | GG     |       | Kruskal-Wallis test | CC vs CG | CC vs GG | CG vs GG |
|                         |        | Median                 | ±QD   | Median | ±QD   | Median | ±QD   |                     |          |          |          |
| PLT 10 <sup>9</sup> /l  | WB     | 266.00                 | 22.75 | 251.50 | 32.00 | 227.00 | 38.25 | 0.197               |          |          |          |
| PCT ml/l                | WB     | 2.39                   | 0.34  | 2.32   | 0.37  | 2.15   | 0.37  | 0.620               |          |          |          |
| MPV fl                  | WB     | 8.75                   | 0.42  | 8.90   | 0.70  | 9.65   | 0.67  | 0.018               | 0.942    | 0.079    | 0.075    |
| PDW fl                  | WB     | 16.00                  | 0.07  | 16.10  | 0.20  | 16.10  | 0.15  | 0.375               |          |          |          |
| WBC 10 <sup>9</sup> /l  | WB     | 8.03                   | 2.71  | 6.30   | 0.97  | 6.07   | 1.17  | 0.028               | 0.035    | 0.025    | 1.000    |
| RBC 10 <sup>12</sup> /l | WB     | 4.72                   | 0.13  | 4.56   | 0.29  | 4.68   | 0.29  | 0.680               |          |          |          |
| EOS%                    | WB     | 2.10                   | 0.58  | 1.90   | 1.08  | 2.60   | 1.28  | 0.121               |          |          |          |
| EOS# 10 <sup>9</sup> /L | WB     | 0.17                   | 0.04  | 0.12   | 0.06  | 0.16   | 0.07  | 0.180               |          |          |          |
| PLT 10 <sup>9</sup> /l  | PRP    | 375.00                 | 51.00 | 339.50 | 54.50 | 345.00 | 77.50 | 0.940               |          |          |          |
| PCT ml/l                | PRP    | 0.31                   | 0.05  | 0.30   | 0.05  | 0.30   | 0.06  | 0.995               |          |          |          |
| MPV fl                  | PRP    | 8.30                   | 0.40  | 8.50   | 0.45  | 8.60   | 0.50  | 0.111               |          |          |          |
| PDW fl                  | PRP    | 14.45                  | 0.25  | 14.50  | 0.20  | 14.60  | 0.20  | 0.384               |          |          |          |

| Parameter               | Source | Genotypes of rs1413711 |       |        |       |        |       | <i>P</i> value      |          |          |          |
|-------------------------|--------|------------------------|-------|--------|-------|--------|-------|---------------------|----------|----------|----------|
|                         |        | CC                     |       | CT     |       | TT     |       | Kruskal-Wallis test | CC vs CT | CC vs TT | CT vs TT |
|                         |        | Median                 | ±QD   | Median | ±QD   | Median | ±QD   |                     |          |          |          |
| PLT 10 <sup>9</sup> /l  | WB     | 264.00                 | 28.00 | 242.00 | 37.75 | 220.00 | 37.00 | 0.009               | 1.000    | 0.012    | 0.030    |
| PCT ml/l                | WB     | 2.35                   | 0.28  | 2.33   | 0.38  | 2.03   | 0.31  | 0.090               |          |          |          |
| MPV fl                  | WB     | 8.90                   | 0.55  | 9.00   | 0.68  | 9.70   | 0.65  | 0.018               | 1.000    | 0.019    | 0.079    |
| PDW fl                  | WB     | 16.00                  | 0.15  | 16.05  | 0.15  | 16.20  | 0.25  | 0.444               |          |          |          |
| WBC 10 <sup>9</sup> /l  | WB     | 6.80                   | 1.15  | 6.32   | 1.07  | 5.29   | 0.79  | 0.023               | 1.000    | 0.025    | 0.086    |
| RBC 10 <sup>12</sup> /l | WB     | 4.54                   | 0.27  | 4.68   | 0.26  | 4.75   | 0.41  | 0.262               |          |          |          |
| EOS%                    | WB     | 2.10                   | 0.70  | 2.30   | 1.03  | 2.60   | 1.00  | 0.306               |          |          |          |
| EOS# 10*9/L             | WB     | 0.14                   | 0.06  | 0.14   | 0.08  | 0.13   | 0.04  | 0.990               |          |          |          |
| PLT 10 <sup>9</sup> /l  | PRP    | 351.50                 | 54.50 | 337.00 | 60.00 | 343.50 | 83.50 | 0.571               |          |          |          |
| PCT ml/l                | PRP    | 0.31                   | 0.05  | 0.29   | 0.07  | 0.30   | 0.06  | 0.436               |          |          |          |
| MPV fl                  | PRP    | 8.70                   | 0.40  | 8.50   | 0.35  | 8.80   | 0.60  | 0.054               |          |          |          |
| PDW fl                  | PRP    | 14.60                  | 0.25  | 14.50  | 0.20  | 14.75  | 0.30  | 0.033               | 0.691    | 0.639    | 0.031    |

| Parameter               | Source | Genotypes of rs3024998 |       |        |       |        |       | <i>P</i> value      |          |          |          |
|-------------------------|--------|------------------------|-------|--------|-------|--------|-------|---------------------|----------|----------|----------|
|                         |        | CC                     |       | CT     |       | TT     |       | Kruskal-Wallis test | CC vs CT | CC vs TT | CT vs TT |
|                         |        | Median                 | ±QD   | Median | ±QD   | Median | ±QD   |                     |          |          |          |
| PLT 10 <sup>9</sup> /l  | WB     | 227.00                 | 38.00 | 253.00 | 34.50 | 266.00 | 22.75 | 0.053               |          |          |          |
| PCT ml/l                | WB     | 2.10                   | 0.32  | 2.34   | 0.38  | 2.39   | 0.34  | 0.255               |          |          |          |
| MPV fl                  | WB     | 9.70                   | 0.65  | 8.90   | 0.55  | 8.75   | 0.42  | 0.008               | 0.030    | 0.061    | 1.000    |
| PDW fl                  | WB     | 16.10                  | 0.15  | 16.10  | 0.25  | 16.00  | 0.07  | 0.341               |          |          |          |
| WBC 10 <sup>9</sup> /l  | WB     | 5.98                   | 1.25  | 6.28   | 0.97  | 8.03   | 2.71  | 0.027               | 1.000    | 0.025    | 0.035    |
| RBC 10 <sup>12</sup> /l | WB     | 4.69                   | 0.30  | 4.54   | 0.28  | 4.72   | 0.13  | 0.358               |          |          |          |
| EOS%                    | WB     | 2.60                   | 1.35  | 1.80   | 1.00  | 2.10   | 0.58  | 0.075               |          |          |          |
| EOS# 10*9/L             | WB     | 0.17                   | 0.07  | 0.12   | 0.05  | 0.17   | 0.04  | 0.106               |          |          |          |
| PLT 10 <sup>9</sup> /l  | PRP    | 349.00                 | 72.50 | 339.00 | 66.00 | 375.00 | 51.00 | 0.806               |          |          |          |
| PCT ml/l                | PRP    | 0.30                   | 0.06  | 0.29   | 0.06  | 0.31   | 0.05  | 0.926               |          |          |          |
| MPV fl                  | PRP    | 8.60                   | 0.50  | 8.50   | 0.50  | 8.30   | 0.40  | 0.055               |          |          |          |
| PDW fl                  | PRP    | 14.60                  | 0.20  | 14.50  | 0.25  | 14.45  | 0.25  | 0.088               |          |          |          |

| Parameter               | Source | Genotypes of rs3025021 |       |        |       |        |       | P value             |          |          |          |
|-------------------------|--------|------------------------|-------|--------|-------|--------|-------|---------------------|----------|----------|----------|
|                         |        | CC                     |       | CT     |       | TT     |       | Kruskal-Wallis test | CC vs CT | CC vs TT | CT vs TT |
|                         |        | Median                 | ±QD   | Median | ±QD   | Median | ±QD   |                     |          |          |          |
| PLT 10 <sup>9</sup> /l  | WB     | 236.50                 | 41.50 | 246.00 | 41.00 | 227.00 | 9.50  | 0.756               |          |          |          |
| PCT ml/l                | WB     | 2.21                   | 0.39  | 2.32   | 0.37  | 2.31   | 0.16  | 0.918               |          |          |          |
| MPV fl                  | WB     | 9.05                   | 0.75  | 9.40   | 0.70  | 9.10   | 0.75  | 0.933               |          |          |          |
| PDW fl                  | WB     | 16.05                  | 0.20  | 16.10  | 0.20  | 16.00  | 0.10  | 0.622               |          |          |          |
| WBC 10 <sup>9</sup> /l  | WB     | 6.25                   | 1.57  | 6.36   | 1.04  | 5.13   | 0.59  | 0.214               |          |          |          |
| RBC 10 <sup>12</sup> /l | WB     | 4.66                   | 0.31  | 4.67   | 0.35  | 4.75   | 0.21  | 0.795               |          |          |          |
| EOS%                    | WB     | 1.90                   | 0.65  | 2.50   | 1.05  | 2.00   | 1.40  | 0.258               |          |          |          |
| EOS# 10*9/L             | WB     | 0.12                   | 0.05  | 0.17   | 0.08  | 0.16   | 0.05  | 0.270               |          |          |          |
| PLT 10 <sup>9</sup> /l  | PRP    | 356.50                 | 74.00 | 334.00 | 59.25 | 344.00 | 70.00 | 0.464               |          |          |          |
| PCT ml/l                | PRP    | 0.31                   | 0.06  | 0.29   | 0.06  | 0.29   | 0.08  | 0.559               |          |          |          |
| MPV fl                  | PRP    | 8.55                   | 0.50  | 8.55   | 0.40  | 8.75   | 0.30  | 0.663               |          |          |          |
| PDW fl                  | PRP    | 14.50                  | 0.20  | 14.60  | 0.25  | 14.60  | 0.30  | 0.588               |          |          |          |

Legend: MPV, platelet volume; PCT, plateletcrit; *VEGFA*, vascular endothelial growth factor A; PDW, platelet distribution width; PLT, platelets; QD, Quartile Deviation; WBC, white blood cells; RBC, red blood cells; EOS, eosinophils.

**Table S8.** Whole blood (WB) and platelet-rich plasma (PRP) parameters values in individuals with particular variants of the *VEGFA* gene polymorphisms in recessive/dominant model.

| Parameter               | Source | rs699947 |       |        |       | <i>P. Mann-Whitney</i><br>U test |
|-------------------------|--------|----------|-------|--------|-------|----------------------------------|
|                         |        | CC       |       | AC+AA  |       |                                  |
|                         |        | Median   | ±QD   | Median | ±QD   |                                  |
| PLT 10 <sup>9</sup> /l  | WB     | 264.00   | 28.00 | 228.00 | 37.00 | 0.099                            |
| PCT ml/l                | WB     | 2.35     | 0.28  | 2.22   | 0.38  | 0.312                            |
| MPV fl                  | WB     | 8.90     | 0.55  | 9.40   | 0.75  | 0.080                            |
| PDW fl                  | WB     | 16.00    | 0.15  | 16.10  | 0.15  | 0.861                            |
| WBC 10 <sup>9</sup> /l  | WB     | 6.80     | 1.15  | 6.17   | 1.11  | 0.099                            |
| RBC 10 <sup>12</sup> /l | WB     | 4.54     | 0.27  | 4.69   | 0.31  | 0.129                            |
| EOS%                    | WB     | 2.10     | 0.70  | 2.30   | 1.00  | 0.279                            |
| EOS# 10*9/L             | WB     | 0.14     | 0.06  | 0.14   | 0.06  | 0.898                            |
| PLT 10 <sup>9</sup> /l  | PRP    | 351.50   | 54.50 | 338.50 | 74.00 | 0.428                            |
| PCT ml/l                | PRP    | 0.31     | 0.05  | 0.29   | 0.07  | 0.413                            |
| MPV fl                  | PRP    | 8.70     | 0.40  | 8.55   | 0.45  | 0.962                            |
| PDW fl                  | PRP    | 14.60    | 0.25  | 14.60  | 0.25  | 0.701                            |

| Parameter               | Source | rs699947 |       |        |       | <i>P. Mann-Whitney</i><br>U test |
|-------------------------|--------|----------|-------|--------|-------|----------------------------------|
|                         |        | AA       |       | AC+CC  |       |                                  |
|                         |        | Median   | ±QD   | Median | ±QD   |                                  |
| PLT 10 <sup>9</sup> /l  | WB     | 221.50   | 38.00 | 251.50 | 32.75 | 0.007                            |
| PCT ml/l                | WB     | 2.04     | 0.31  | 2.33   | 0.36  | 0.037                            |
| MPV fl                  | WB     | 9.70     | 0.70  | 9.00   | 0.60  | 0.022                            |
| PDW fl                  | WB     | 16.15    | 0.25  | 16.05  | 0.15  | 0.416                            |
| WBC 10 <sup>9</sup> /l  | WB     | 5.38     | 1.01  | 6.59   | 1.13  | 0.020                            |
| RBC 10 <sup>12</sup> /l | WB     | 4.73     | 0.41  | 4.66   | 0.28  | 0.340                            |
| EOS%                    | WB     | 2.60     | 1.00  | 2.10   | 1.05  | 0.135                            |
| EOS# 10*9/L             | WB     | 0.14     | 0.04  | 0.14   | 0.07  | 0.798                            |
| PLT 10 <sup>9</sup> /l  | PRP    | 349.00   | 84.00 | 341.00 | 54.00 | 0.540                            |
| PCT ml/l                | PRP    | 0.31     | 0.07  | 0.29   | 0.06  | 0.308                            |
| MPV fl                  | PRP    | 8.80     | 0.55  | 8.50   | 0.40  | 0.011                            |
| PDW fl                  | PRP    | 14.70    | 0.25  | 14.50  | 0.20  | 0.054                            |

| Parameter               | Source | rs2010963 |       |        |       | <i>P. Mann-Whitney</i><br>U test |
|-------------------------|--------|-----------|-------|--------|-------|----------------------------------|
|                         |        | GG        |       | CG+CC  |       |                                  |
|                         |        | Median    | ±QD   | Median | ±QD   |                                  |
| PLT 10 <sup>9</sup> /l  | WB     | 227.00    | 38.25 | 257.00 | 32.00 | 0.077                            |
| PCT ml/l                | WB     | 2.15      | 0.37  | 2.34   | 0.34  | 0.345                            |
| MPV fl                  | WB     | 9.65      | 0.67  | 8.90   | 0.52  | 0.008                            |
| PDW fl                  | WB     | 16.10     | 0.15  | 16.00  | 0.15  | 0.824                            |
| WBC 10 <sup>9</sup> /l  | WB     | 6.07      | 1.17  | 6.70   | 1.19  | 0.368                            |
| RBC 10 <sup>12</sup> /l | WB     | 4.68      | 0.29  | 4.66   | 0.28  | 0.597                            |
| EOS%                    | WB     | 2.60      | 1.28  | 2.05   | 0.95  | 0.043                            |
| EOS# 10*9/L             | WB     | 0.16      | 0.07  | 0.13   | 0.06  | 0.226                            |
| PLT 10 <sup>9</sup> /l  | PRP    | 345.00    | 77.50 | 342.50 | 54.25 | 0.959                            |
| PCT ml/l                | PRP    | 0.30      | 0.06  | 0.31   | 0.05  | 0.934                            |
| MPV fl                  | PRP    | 8.60      | 0.50  | 8.45   | 0.45  | 0.071                            |
| PDW fl                  | PRP    | 14.60     | 0.20  | 14.50  | 0.20  | 0.169                            |

| Parameter               | Source | rs2010963 |       |        |       | <i>P. Mann-Whitney</i><br>U test |
|-------------------------|--------|-----------|-------|--------|-------|----------------------------------|
|                         |        | CC        |       | CG+GG  |       |                                  |
|                         |        | Median    | ±QD   | Median | ±QD   |                                  |
| PLT 10 <sup>9</sup> /l  | WB     | 266.00    | 22.75 | 234.00 | 40.50 | 0.414                            |
| PCT ml/l                | WB     | 2.39      | 0.34  | 2.30   | 0.38  | 0.967                            |
| MPV fl                  | WB     | 8.75      | 0.42  | 9.25   | 0.75  | 0.082                            |
| PDW fl                  | WB     | 16.00     | 0.07  | 16.10  | 0.15  | 0.167                            |
| WBC 10 <sup>9</sup> /l  | WB     | 8.03      | 2.71  | 6.21   | 1.11  | 0.008                            |
| RBC 10 <sup>12</sup> /l | WB     | 4.72      | 0.13  | 4.67   | 0.31  | 0.608                            |
| EOS%                    | WB     | 2.10      | 0.58  | 2.30   | 1.13  | 0.357                            |
| EOS# 10*9/L             | WB     | 0.17      | 0.04  | 0.13   | 0.06  | 0.330                            |
| PLT 10 <sup>9</sup> /l  | PRP    | 375.00    | 51.00 | 340.50 | 66.50 | 0.730                            |
| PCT ml/l                | PRP    | 0.31      | 0.05  | 0.30   | 0.06  | 0.975                            |
| MPV fl                  | PRP    | 8.30      | 0.40  | 8.60   | 0.45  | 0.122                            |
| PDW fl                  | PRP    | 14.45     | 0.25  | 14.60  | 0.23  | 0.779                            |

| Parameter               | Source | rs1413711 |       |        |       | <i>P. Mann-Whitney</i><br>U test |
|-------------------------|--------|-----------|-------|--------|-------|----------------------------------|
|                         |        | TT        |       | CT+CC  |       |                                  |
|                         |        | Median    | ±QD   | Median | ±QD   |                                  |
| PLT 10 <sup>9</sup> /l  | WB     | 220.00    | 37.00 | 253.00 | 32.00 | 0.003                            |
| PCT ml/l                | WB     | 2.03      | 0.31  | 2.33   | 0.36  | 0.030                            |
| MPV fl                  | WB     | 9.70      | 0.65  | 9.00   | 0.65  | 0.008                            |
| PDW fl                  | WB     | 16.20     | 0.25  | 16.00  | 0.15  | 0.256                            |
| WBC 10 <sup>9</sup> /l  | WB     | 5.29      | 0.79  | 6.69   | 1.13  | 0.009                            |
| RBC 10 <sup>12</sup> /l | WB     | 4.75      | 0.41  | 4.66   | 0.27  | 0.286                            |
| EOS%                    | WB     | 2.60      | 1.00  | 2.10   | 1.05  | 0.169                            |
| EOS# 10*9/L             | WB     | 0.13      | 0.04  | 0.14   | 0.07  | 0.997                            |
| PLT 10 <sup>9</sup> /l  | PRP    | 343.50    | 83.50 | 343.00 | 54.50 | 0.689                            |
| PCT ml/l                | PRP    | 0.30      | 0.06  | 0.30   | 0.06  | 0.500                            |
| MPV fl                  | PRP    | 8.80      | 0.60  | 8.50   | 0.40  | 0.022                            |
| PDW fl                  | PRP    | 14.75     | 0.30  | 14.50  | 0.20  | 0.021                            |

| Parameter               | Source | rs1413711 |       |        |       | <i>P. Mann-Whitney</i><br>U test |
|-------------------------|--------|-----------|-------|--------|-------|----------------------------------|
|                         |        | CC        |       | CT+TT  |       |                                  |
|                         |        | Median    | ±QD   | Median | ±QD   |                                  |
| PLT 10 <sup>9</sup> /l  | WB     | 264.00    | 28.00 | 228.00 | 37.00 | 0.099                            |
| PCT ml/l                | WB     | 2.35      | 0.28  | 2.22   | 0.38  | 0.312                            |
| MPV fl                  | WB     | 8.90      | 0.55  | 9.40   | 0.75  | 0.080                            |
| PDW fl                  | WB     | 16.00     | 0.15  | 16.10  | 0.15  | 0.861                            |
| WBC 10 <sup>9</sup> /l  | WB     | 6.80      | 1.15  | 6.17   | 1.11  | 0.099                            |
| RBC 10 <sup>12</sup> /l | WB     | 4.54      | 0.27  | 4.69   | 0.31  | 0.129                            |
| EOS%                    | WB     | 2.10      | 0.70  | 2.30   | 1.00  | 0.279                            |
| EOS# 10*9/L             | WB     | 0.14      | 0.06  | 0.14   | 0.06  | 0.898                            |
| PLT 10 <sup>9</sup> /l  | PRP    | 351.50    | 54.50 | 338.50 | 74.00 | 0.428                            |
| PCT ml/l                | PRP    | 0.31      | 0.05  | 0.29   | 0.07  | 0.413                            |
| MPV fl                  | PRP    | 8.70      | 0.40  | 8.55   | 0.45  | 0.962                            |
| PDW fl                  | PRP    | 14.60     | 0.25  | 14.60  | 0.25  | 0.701                            |

| Parameter               | Source | rs3024998 |       |        |       | <i>P. Mann-Whitney</i><br>U test |
|-------------------------|--------|-----------|-------|--------|-------|----------------------------------|
|                         |        | TT        |       | CT+CC  |       |                                  |
|                         |        | Median    | ±QD   | Median | ±QD   |                                  |
| PLT 10 <sup>9</sup> /l  | WB     | 266.00    | 22.75 | 234.00 | 40.50 | 0.414                            |
| PCT ml/l                | WB     | 2.39      | 0.34  | 2.30   | 0.38  | 0.967                            |
| MPV fl                  | WB     | 8.75      | 0.42  | 9.25   | 0.75  | 0.082                            |
| PDW fl                  | WB     | 16.00     | 0.07  | 16.10  | 0.15  | 0.167                            |
| WBC 10 <sup>9</sup> /l  | WB     | 8.03      | 2.71  | 6.21   | 1.11  | 0.008                            |
| RBC 10 <sup>12</sup> /l | WB     | 4.72      | 0.13  | 4.67   | 0.31  | 0.608                            |
| EOS%                    | WB     | 2.10      | 0.58  | 2.30   | 1.13  | 0.357                            |
| EOS# 10*9/L             | WB     | 0.17      | 0.04  | 0.13   | 0.06  | 0.330                            |
| PLT 10 <sup>9</sup> /l  | PRP    | 375.00    | 51.00 | 340.50 | 66.50 | 0.730                            |
| PCT ml/l                | PRP    | 0.3115    | 0.05  | 0.30   | 0.06  | 0.975                            |
| MPV fl                  | PRP    | 8.30      | 0.40  | 8.60   | 0.45  | 0.122                            |
| PDW fl                  | PRP    | 14.45     | 0.25  | 14.60  | 0.23  | 0.779                            |

| Parameter               | Source | rs3024998 |       |        |       | P. Mann-Whitney<br>U test |
|-------------------------|--------|-----------|-------|--------|-------|---------------------------|
|                         |        | CC        |       | CT+TT  |       |                           |
|                         |        | Median    | ±QD   | Median | ±QD   |                           |
| PLT 10 <sup>9</sup> /l  | WB     | 227.00    | 38.00 | 261.50 | 32.50 | 0.016                     |
| PCT ml/l                | WB     | 2.10      | 0.32  | 2.35   | 0.37  | 0.111                     |
| MPV fl                  | WB     | 9.70      | 0.65  | 8.90   | 0.50  | 0.003                     |
| PDW fl                  | WB     | 16.10     | 0.15  | 16.00  | 0.20  | 0.397                     |
| WBC 10 <sup>9</sup> /l  | WB     | 5.98      | 1.25  | 6.53   | 1.13  | 0.362                     |
| RBC 10 <sup>12</sup> /l | WB     | 4.69      | 0.30  | 4.64   | 0.28  | 0.255                     |
| EOS%                    | WB     | 2.60      | 1.35  | 1.90   | 0.90  | 0.024                     |
| EOS# 10*9/L             | WB     | 0.17      | 0.07  | 0.13   | 0.06  | 0.128                     |
| PLT 10 <sup>9</sup> /l  | PRP    | 349.00    | 72.50 | 340.00 | 54.00 | 0.668                     |
| PCT ml/l                | PRP    | 0.30      | 0.06  | 0.31   | 0.06  | 0.703                     |
| MPV fl                  | PRP    | 8.60      | 0.50  | 8.40   | 0.50  | 0.027                     |
| PDW fl                  | PRP    | 14.60     | 0.20  | 14.50  | 0.20  | 0.030                     |

| Parameter               | Source | rs3025021 |       |        |       | P. Mann-Whitney<br>U test |
|-------------------------|--------|-----------|-------|--------|-------|---------------------------|
|                         |        | TT        |       | CT+CC  |       |                           |
|                         |        | Median    | ±QD   | Median | ±QD   |                           |
| PLT 10 <sup>9</sup> /l  | WB     | 227.00    | 9.50  | 246.00 | 41.00 | 0.853                     |
| PCT ml/l                | WB     | 2.31      | 0.16  | 2.31   | 0.38  | 0.907                     |
| MPV fl                  | WB     | 9.10      | 0.75  | 9.10   | 0.70  | 0.722                     |
| PDW fl                  | WB     | 16.00     | 0.10  | 16.10  | 0.15  | 0.955                     |
| WBC 10 <sup>9</sup> /l  | WB     | 5.13      | 0.59  | 6.32   | 1.15  | 0.081                     |
| RBC 10 <sup>12</sup> /l | WB     | 4.75      | 0.21  | 4.66   | 0.30  | 0.589                     |
| EOS%                    | WB     | 2.00      | 1.40  | 2.30   | 1.00  | 0.815                     |
| EOS# 10*9/L             | WB     | 0.16      | 0.05  | 0.14   | 0.06  | 0.802                     |
| PLT 10 <sup>9</sup> /l  | PRP    | 344.00    | 70.00 | 343.00 | 67.00 | 0.288                     |
| PCT ml/l                | PRP    | 0.29      | 0.08  | 0.30   | 0.06  | 0.291                     |
| MPV fl                  | PRP    | 8.75      | 0.30  | 8.55   | 0.43  | 0.444                     |
| PDW fl                  | PRP    | 14.60     | 0.30  | 14.60  | 0.25  | 0.472                     |

| Parameter               | Source | rs3025021 |       |        |       | <i>P. Mann-Whitney</i><br>U test |
|-------------------------|--------|-----------|-------|--------|-------|----------------------------------|
|                         |        | CC        |       | CT+TT  |       |                                  |
|                         |        | Median    | ±QD   | Median | ±QD   |                                  |
| PLT 10 <sup>9</sup> /l  | WB     | 236.50    | 41.50 | 240.00 | 36.75 | 0.512                            |
| PCT ml/l                | WB     | 2.21      | 0.39  | 2.32   | 0.33  | 0.682                            |
| MPV fl                  | WB     | 9.05      | 0.75  | 9.30   | 0.80  | 0.997                            |
| PDW fl                  | WB     | 16.05     | 0.20  | 16.10  | 0.20  | 0.354                            |
| WBC 10 <sup>9</sup> /l  | WB     | 6.25      | 1.57  | 6.26   | 1.07  | 0.777                            |
| RBC 10 <sup>12</sup> /l | WB     | 4.66      | 0.31  | 4.71   | 0.33  | 0.605                            |
| EOS%                    | WB     | 1.90      | 0.65  | 2.45   | 1.30  | 0.102                            |
| EOS# 10*9/L             | WB     | 0.12      | 0.05  | 0.17   | 0.08  | 0.137                            |
| PLT 10 <sup>9</sup> /l  | PRP    | 356.50    | 74.00 | 335.00 | 61.00 | 0.718                            |
| PCT ml/l                | PRP    | 0.31      | 0.06  | 0.29   | 0.05  | 0.950                            |
| MPV fl                  | PRP    | 8.55      | 0.50  | 8.60   | 0.40  | 0.520                            |
| PDW fl                  | PRP    | 14.50     | 0.20  | 14.60  | 0.25  | 0.378                            |

Legend: MPV, platelet volume; PCT, plateletcrit; *VEGFA*, vascular endothelial growth factor A; PDW, platelet distribution width; PLT, platelets; QD, Quartile Deviation; WBC, white blood cells; RBC, red blood cells; EOS, eosinophils.

**Table S9.** The frequencies (%) and medians ( $\pm$  QD) of basic demographic and clinical characteristics of patients in relation to genotypes of the *VEGFA* gene polymorphisms.

| rs699947  | Parameter                        | Genotypes |          |          |          |          |          | P value                   |          |          |          |
|-----------|----------------------------------|-----------|----------|----------|----------|----------|----------|---------------------------|----------|----------|----------|
|           |                                  | AA        |          | AC       |          | CC       |          | Kruskal-Wallis test       | AA vs AC | AA vs CC | AC vs CC |
|           |                                  | Median    | ±QD      | Median   | ±QD      | Median   | ±QD      |                           |          |          |          |
|           | Age years, median ± QD           | 47.00     | 5.25     | 45.00    | 4.50     | 46.50    | 6.50     | 0.159                     |          |          |          |
|           | BMI, median ± QD                 | 25.33     | 2.97     | 25.28    | 1.75     | 26.96    | 3.12     | 0.399                     |          |          |          |
|           | Cigarettes n/day, median ± QD    | 0.00      | 0.00     | 0.00     | 0.00     | 0.00     | 0.00     | 0.783                     |          |          |          |
|           | Alcohol units/ week, median ± QD | 2.00      | 1.00     | 1.00     | 2.00     | 0.00     | 1.00     | 0.010                     | 1.000    | 0.024    | 0.052    |
|           |                                  | <b>n</b>  | <b>%</b> | <b>n</b> | <b>%</b> | <b>n</b> | <b>%</b> | <b>χ<sup>2</sup> test</b> |          |          |          |
|           | Male sex, n (%)                  | 15        | 51.72    | 29       | 72.50    | 11       | 32.35    | 0.298                     |          |          |          |
|           | Cigarette smoking, n (%)         | 6         | 20.69    | 11       | 15.94    | 5        | 14.71    | 0.801                     |          |          |          |
|           | Hypertension, n (%)              | 3         | 10.34    | 13       | 18.84    | 2        | 5.88     | 0.166                     |          |          |          |
|           | Physical therapy, n (%)          | 12        | 41.38    | 31       | 44.93    | 15       | 44.12    | 0.472                     |          |          |          |
|           | Manual therapy, n (%)            | 9         | 31.03    | 14       | 20.29    | 4        | 11.76    | 0.271                     |          |          |          |
|           | NSAIDs, n (%)                    | 11        | 37.93    | 35       | 50.72    | 15       | 44.12    | 0.052                     |          |          |          |
|           | Vit. B12 suppl., n (%)           | 4         | 13.79    | 19       | 27.54    | 5        | 14.71    | 0.177                     |          |          |          |
|           | Diabetes mellitus, n (%)         | 0         | 0.00     | 1        | 1.45     | 3        | 8.82     | 0.078                     |          |          |          |
|           | Gout, n (%)                      | 3         | 10.34    | 0        | 0.00     | 5        | 14.71    | 0.007                     |          |          |          |
| rs2010963 | Parameter                        | Genotypes |          |          |          |          |          | P value                   |          |          |          |
|           |                                  | CC        |          | CG       |          | GG       |          | Kruskal-Wallis test       | CC vs CG | CC vs GG | CG vs GG |
|           |                                  | Median    | ±QD      | Median   | ±QD      | Median   | ±QD      |                           |          |          |          |
|           | Age years, median ± QD           | 45.00     | 3.50     | 45.00    | 6.00     | 47.00    | 6.00     | 0.887                     |          |          |          |
|           | BMI, median ± QD                 | 26.90     | 3.83     | 25.83    | 1.97     | 25.19    | 2.05     | 0.730                     |          |          |          |
|           | Cigarettes n/day, median ± QD    | 0.00      | 10.00    | 0.00     | 0.00     | 0.00     | 0.00     | 0.008                     | 0.485    | 1.000    | 0.217    |
|           | Alcohol units/ week, median ± QD | 0.00      | 0.00     | 0.00     | 1.50     | 1.00     | 2.00     | 0.007                     | 0.422    | 0.029    | 0.125    |
|           |                                  | <b>n</b>  | <b>%</b> | <b>n</b> | <b>%</b> | <b>n</b> | <b>%</b> | <b>χ<sup>2</sup> test</b> |          |          |          |
|           | Male sex, n (%)                  | 6         | 60.00    | 21       | 37.5     | 28       | 42.42    | 0.411                     |          |          |          |
|           | Cigarette smoking, n (%)         | 3         | 30.00    | 3        | 5.36     | 16       | 24.24    | 0.019                     |          |          |          |
|           | Hypertension, n (%)              | 0         | 0.00     | 5        | 8.93     | 13       | 19.70    | 0.096                     |          |          |          |
|           | Physical therapy, n (%)          | 6         | 60.00    | 26       | 46.43    | 26       | 39.39    | 0.905                     |          |          |          |
|           | Manual therapy, n (%)            | 0         | 0.00     | 12       | 21.43    | 15       | 22.73    | 0.783                     |          |          |          |
|           | NSAIDs, n (%)                    | 6         | 60.00    | 23       | 41.07    | 32       | 48.48    | 0.202                     |          |          |          |
|           | Vit. B12 suppl., n (%)           | 1         | 10.00    | 14       | 25.00    | 13       | 19.70    | 0.516                     |          |          |          |
|           | Diabetes mellitus, n (%)         | 3         | 30.00    | 1        | 1.79     | 0        | 0.00     | 0.000                     |          |          |          |
|           | Gout, n (%)                      | 2         | 20.00    | 2        | 3.57     | 4        | 6.06     | 0.133                     |          |          |          |



| rs1413711 | Parameter                        | Genotypes |       |        |       |        |       | P value             |          |          |          |
|-----------|----------------------------------|-----------|-------|--------|-------|--------|-------|---------------------|----------|----------|----------|
|           |                                  | CC        |       | CT     |       | TT     |       | Kruskal-Wallis test | CC vs CT | CC vs TT | CT vs TT |
|           |                                  | Median    | ±QD   | Median | ±QD   | Median | ±QD   |                     |          |          |          |
|           | Age years, median ± QD           | 46.50     | 6.50  | 45.00  | 4.50  | 47.00  | 5.50  | 0.210               |          |          |          |
|           | BMI, median ± QD                 | 26.96     | 3.12  | 25.28  | 1.82  | 25.70  | 2.97  | 0.339               |          |          |          |
|           | Cigarettes n/day, median ± QD    | 0.00      | 0.00  | 0.00   | 0.00  | 0.00   | 0.00  | 0.958               |          |          |          |
|           | Alcohol units/ week, median ± QD | 0.00      | 1.00  | 1.00   | 2.00  | 2.00   | 2.00  | 0.007               | 0.069    | 0.013    | 0.847    |
|           |                                  | n         | %     | n      | %     | n      | %     | χ <sup>2</sup> test |          |          |          |
|           | Male sex, n (%)                  | 11        | 32.35 | 28     | 41.18 | 16     | 53.33 | 0.235               |          |          |          |
|           | Cigarette smoking, n (%)         | 5         | 14.71 | 12     | 17.65 | 5      | 16.67 | 0.932               |          |          |          |
|           | Hypertension, n (%)              | 2         | 5.88  | 13     | 19.12 | 3      | 10.00 | 0.149               |          |          |          |
|           | Physical therapy, n (%)          | 15        | 44.12 | 29     | 42.65 | 14     | 46.67 | 0.385               |          |          |          |
|           | Manual therapy, n (%)            | 4         | 11.76 | 13     | 19.12 | 10     | 33.33 | 0.224               |          |          |          |
|           | NSAIDs, n (%)                    | 15        | 44.12 | 34     | 50.00 | 12     | 40.00 | 0.064               |          |          |          |
|           | Vit. B12 suppl., n (%)           | 5         | 14.71 | 19     | 27.94 | 4      | 13.33 | 0.148               |          |          |          |
|           | Diabetes mellitus, n (%)         | 3         | 8.82  | 1      | 1.47  | 0      | 0.00  | 0.068               |          |          |          |
|           | Gout, n (%)                      | 5         | 14.74 | 0      | 0.00  | 3      | 10.00 | 0.008               |          |          |          |
| rs3024998 | Parameter                        | Genotypes |       |        |       |        |       | P value             |          |          |          |
|           |                                  | CC        |       | CT     |       | TT     |       | Kruskal-Wallis test | CC vs CT | CC vs TT | CT vs TT |
|           |                                  | Median    | ±QD   | Median | ±QD   | Median | ±QD   |                     |          |          |          |
|           | Age years, median ± QD           | 46.50     | 6.25  | 45.00  | 5.00  | 45.00  | 3.50  | 0.952               |          |          |          |
|           | BMI, median ± QD                 | 25.33     | 2.05  | 25.83  | 1.97  | 26.90  | 3.83  | 0.763               |          |          |          |
|           | Cigarettes n/day, median ± QD    | 0.00      | 0.00  | 0.00   | 0.00  | 0.00   | 10.00 | 0.006               | 0.196    | 1.000    | 0.479    |
|           | Alcohol units/ week, median ± QD | 2.00      | 2.00  | 0.00   | 1.00  | 0.00   | 0.00  | 0.002               | 0.030    | 0.019    | 0.548    |
|           |                                  | n         | %     | n      | %     | n      | %     | χ <sup>2</sup> test |          |          |          |
|           | Male sex, n (%)                  | 28        | 43.08 | 21     | 36.84 | 6      | 60.00 | 0.371               |          |          |          |
|           | Cigarette smoking, n (%)         | 16        | 24.62 | 3      | 5.26  | 3      | 30.00 | 0.008               |          |          |          |
|           | Hypertension, n (%)              | 13        | 20.00 | 5      | 8.77  | 0      | 0.00  | 0.084               |          |          |          |
|           | Physical therapy, n (%)          | 25        | 38.46 | 27     | 47.37 | 6      | 60.00 | 0.981               |          |          |          |
|           | Manual therapy, n (%)            | 16        | 24.62 | 11     | 19.30 | 0      | 0.00  | 0.833               |          |          |          |
|           | NSAIDs, n (%)                    | 32        | 49.23 | 23     | 40.35 | 6      | 60.00 | 0.249               |          |          |          |
|           | Vit. B12 suppl., n (%)           | 13        | 20.00 | 14     | 24.56 | 1      | 10.00 | 0.551               |          |          |          |
|           | Diabetes mellitus, n (%)         | 0         | 0.00  | 1      | 1.75  | 3      | 30.00 | 0.000               |          |          |          |
|           | Gout, n (%)                      | 4         | 6.45  | 2      | 3.51  | 2      | 20.00 | 0.131               |          |          |          |

| rs3025021 | Parameter                        | Genotypes |       |        |       |        |       | P value             |          |          |          |
|-----------|----------------------------------|-----------|-------|--------|-------|--------|-------|---------------------|----------|----------|----------|
|           |                                  | CC        |       | CT     |       | TT     |       | Kruskal-Wallis test | CC vs CT | CC vs TT | CT vs TT |
|           |                                  | Median    | ±QD   | Median | ±QD   | Median | ±QD   |                     |          |          |          |
|           | Age years, median ± QD           | 46.00     | 5.50  | 46.00  | 5.00  | 43.00  | 6.00  | 0.594               |          |          |          |
|           | BMI, median ± QD                 | 25.59     | 1.82  | 25.47  | 2.34  | 26.53  | 2.32  | 0.737               |          |          |          |
|           | Cigarettes n/day, median ± QD    | 0.00      | 0.75  | 0.00   | 0.00  | 0.00   | 0.00  | 0.078               |          |          |          |
|           | Alcohol units/ week, median ± QD | 1.00      | 1.00  | 1.00   | 1.75  | 0.00   | 1.00  | 0.566               |          |          |          |
|           |                                  | n         | %     | n      | %     | n      | %     | χ <sup>2</sup> test |          |          |          |
|           | Male sex, n (%)                  | 17        | 32.69 | 32     | 45.71 | 6      | 60.00 | 0.167               |          |          |          |
|           | Cigarette smoking, n (%)         | 13        | 25.00 | 9      | 12.86 | 0      | 0.00  | 0.070               |          |          |          |
|           | Hypertension, n (%)              | 10        | 19.23 | 7      | 10.00 | 1      | 10.00 | 0.320               |          |          |          |
|           | Physical therapy, n (%)          | 26        | 50.00 | 30     | 42.86 | 2      | 20.00 | 0.848               |          |          |          |
|           | Manual therapy, n (%)            | 13        | 25.00 | 12     | 17.14 | 2      | 20.00 | 0.680               |          |          |          |
|           | NSAIDs, n (%)                    | 25        | 50.00 | 34     | 48.57 | 2      | 20.00 | 0.639               |          |          |          |
|           | Vit. B12 suppl., n (%)           | 12        | 23.08 | 14     | 20.00 | 2      | 20.00 | 0.915               |          |          |          |
|           | Diabetes mellitus, n (%)         | 0         | 0.00  | 4      | 5.71  | 0      | 0.00  | 0.161               |          |          |          |
|           | Gout, n (%)                      | 0         | 0.00  | 7      | 10.00 | 1      | 10.00 | 0.063               |          |          |          |

Legend: BMI, body mass index; NSAIDs, nonsteroidal anti-inflammatory drugs; QD, quartile deviation; Vit., vitamin; suppl., supplementation.
